# Supplementary material
Source: PubMed Central journal article supplement (PMC11481029)
Supplement: ADMA-33-2101986-s001.pdf [file ADMA-33-2101986-s001.pdf]

# ADVANCED MATERIALS

## Supporting Information

for *Adv. Mater.*, DOI: 10.1002/adma.202101986

Double- to Single-Strand Transition Induces Forces and Motion in DNA Origami Nanostructures

*Fatih N. Gür, Susanne Kempter, Florian Schueder, Christoph Sikeler, Maximilian J. Urban, Ralf Jungmann, Philipp C. Nickels, and Tim Liedl\**

## Supporting Information

### **Double- to Single-Strand Transition Induces Forces and Motion in DNA Origami nanostructures**

*Fatih N. Gür<sup>+</sup>, Susanne Kempter<sup>+</sup>, Florian Schueder, Christoph Sikeler, Maximilian J. Urban, Ralf Jungmann, Philipp C. Nickels and Tim Liedl\**

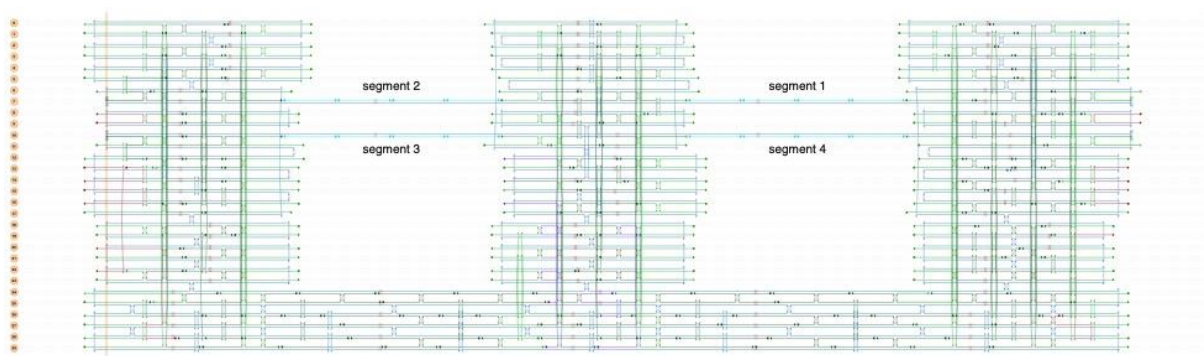

**Figure S1.** The CaDNAno design layout of the DNA origami switch. Blue: scaffold strand (p6834); green: core staple strands; red: handles for either DNA-PAINT or AuNPs attachment; purple: biotin attachment.

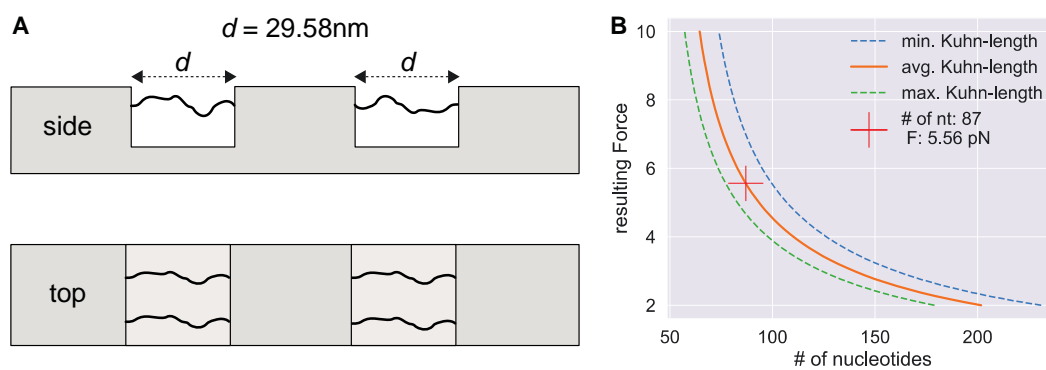

**Figure S2.** (A) Schematic drawing of the DNA origami switch design. (B) Resulting entropic force of each ssDNA-segment as a function of the number of nucleotides spanning the gap distance  $d$ .

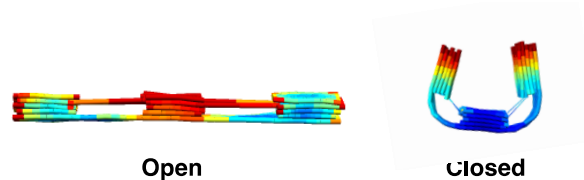

**Figure S3.** CanDo simulations of the switch design in the open and closed state.

Random permutations of the starting point of the M13-based, circular scaffold and the corresponding free energy of secondary structures in the four ssDNA-segments of these permutations:

|          | Segment 1<br>kcal/mol | Segment 2<br>kcal/mol | Segment 3<br>kcal/mol | Segment 4<br>kcal/mol |
|----------|-----------------------|-----------------------|-----------------------|-----------------------|
| <b>1</b> | -4.74                 | -4.71                 | -8.60                 | -4.96                 |
| <b>2</b> | -11.73                | -8.28                 | -7.54                 | -5.12                 |
| <b>3</b> | -10.04                | -6.50                 | -11.11                | -5.77                 |
| <b>4</b> | -14.34                | -6.34                 | -3.67                 | -7.54                 |

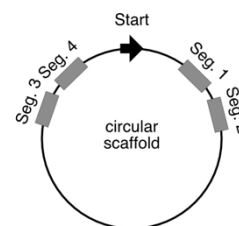

Predicted mean free energy of secondary structures for the sequences chosen from permutation #1:

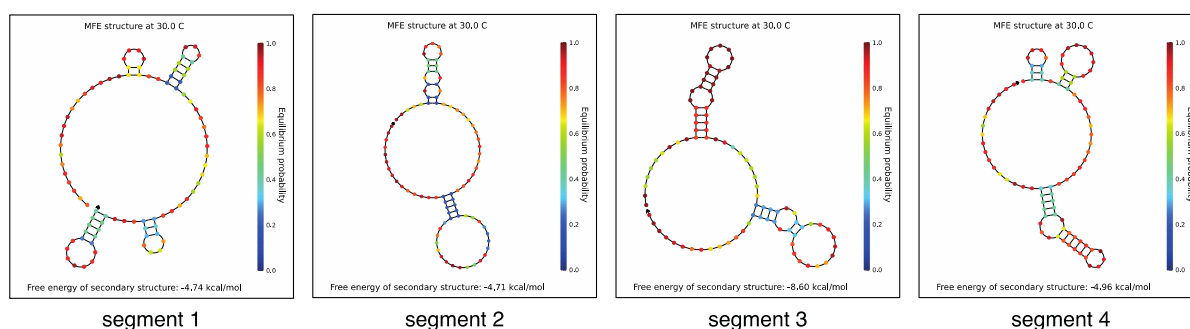

Predicted mean free energy of known hairpins in the M13 sequence as comparison:

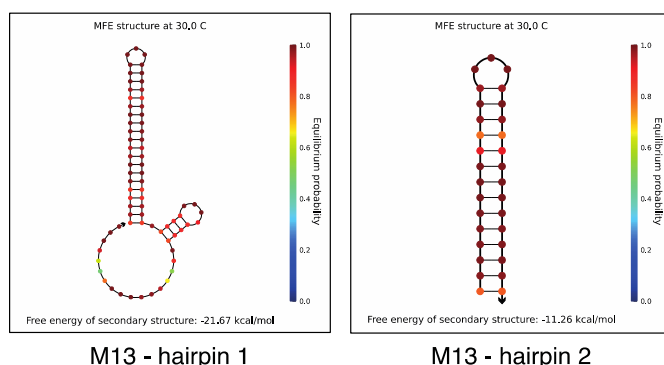

**Figure S4.** Thermodynamic NUPACK analysis of the ssDNA sections. **Top:** to minimize the effect of potential secondary structures, we performed four random permutations of the scaffold starting point and computed the mean free energy of occurring secondary structures inside the four segments. We then chose the permutation with the least predicted secondary structures (highlighted in green). **Middle:** the predicted mean free energy structures for the four selected ssDNA sequences. **Bottom:** mean free energy structure of two known hairpins in the M13mp18 sequence as comparison.

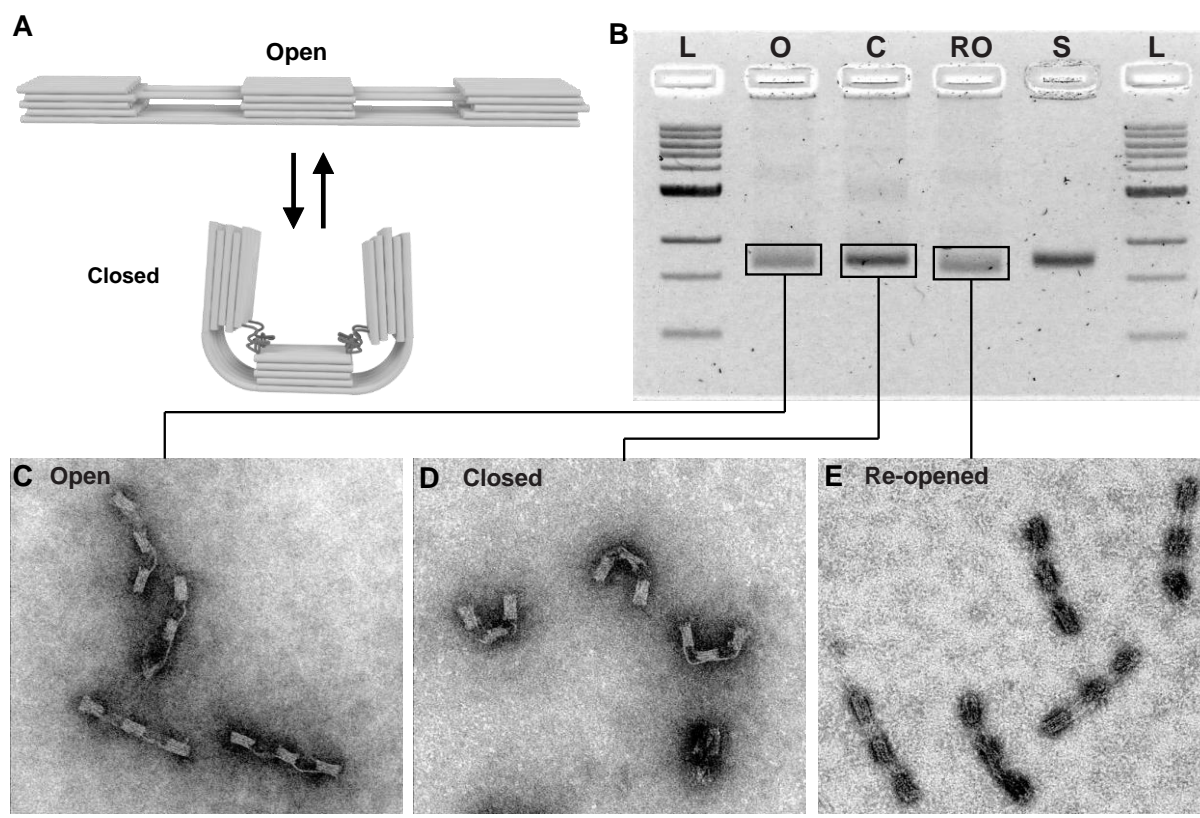

**Figure S5.** Agarose gel electrophoresis and TEM analysis of folded DNA origami switches. (A) Schematic representation of the DNA origami switch, illustrating open and closed states. (B) Agarose gel electrophoresis of DNA origami switch after folding and sequential switching from open to closed and re-opened states L: 1kb DNA ladder, O: open state, C: closed state, RO: re-opened state, S: p8634 scaffold. The bands containing correctly assembled structures were extracted and analyzed with TEM. TEM micrographs of the open (C), closed (D), and re-opened (e) states. Scale bar: 100 nm.

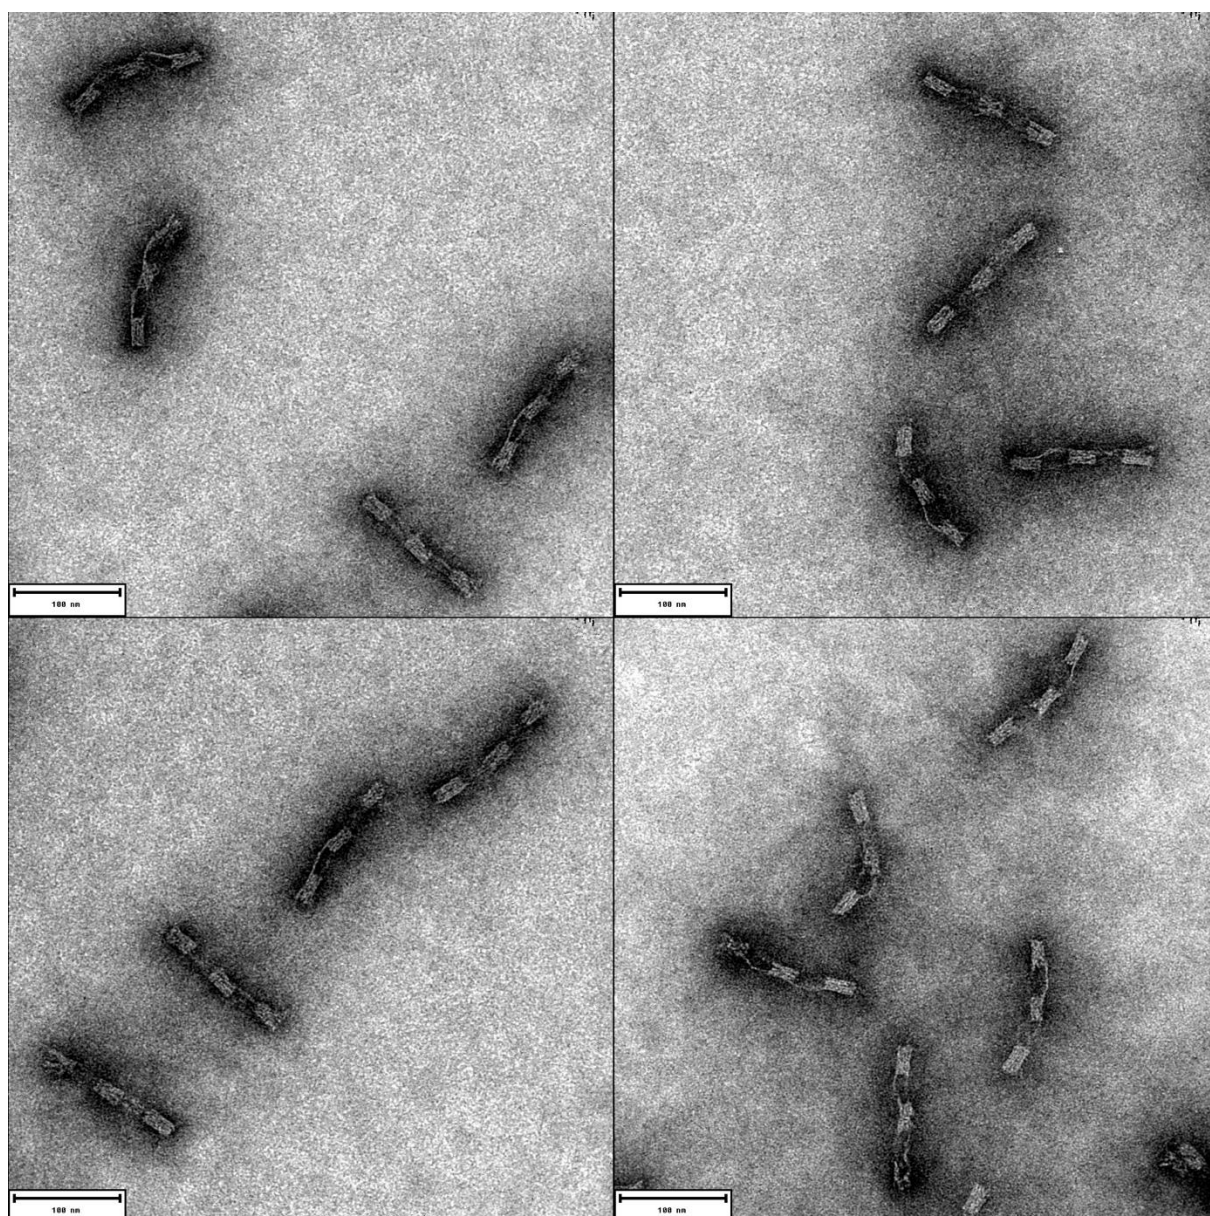

**Figure S6.** Exemplary TEM micrographs of the switch in the open state. Scale bars: 100 nm.

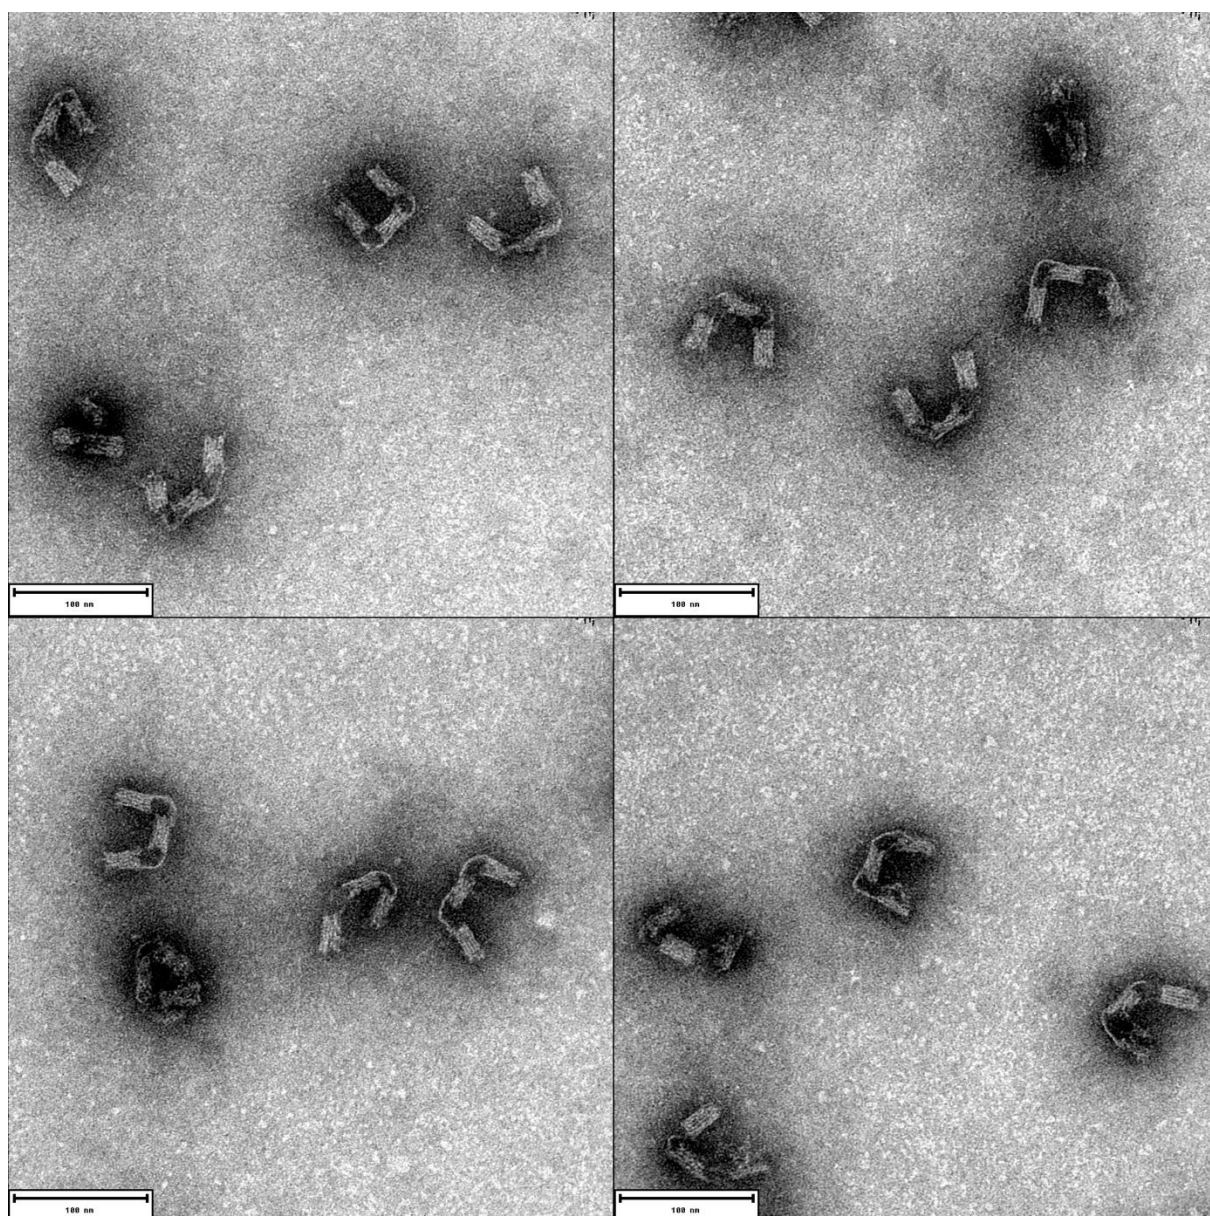

**Figure S7.** Exemplary TEM micrographs of the switch in the closed state. Scale bars: 100 nm.

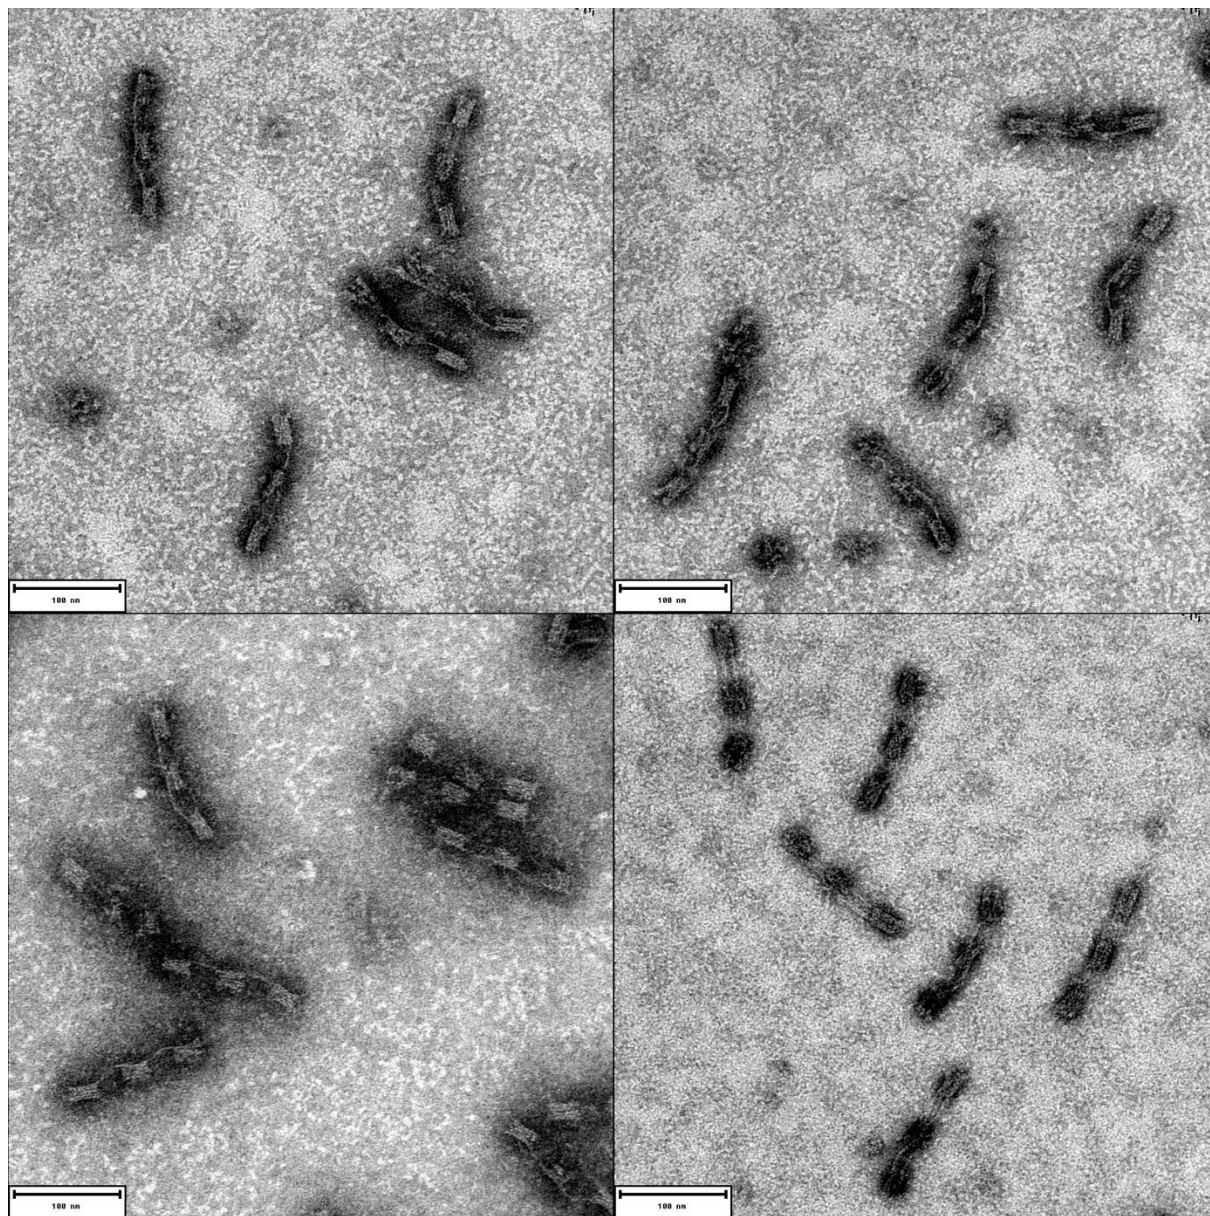

**Figure S8.** Exemplary TEM micrographs of the switch in the re-opened state. Scale bars: 100 nm.



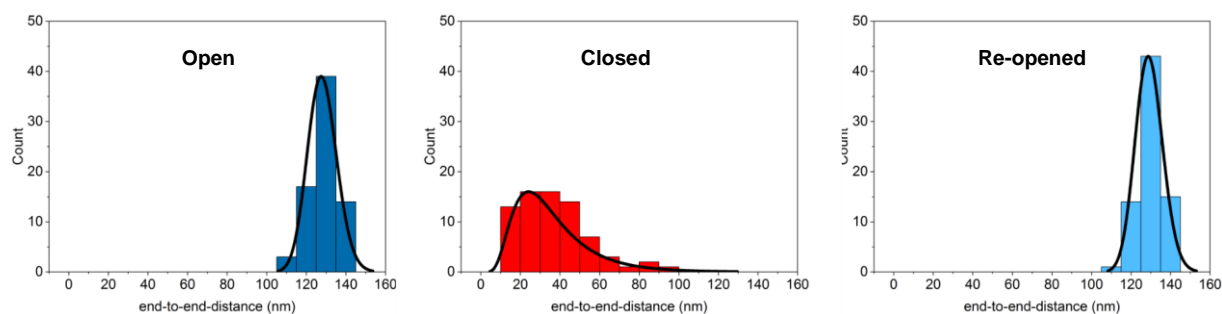

**Figure S9.** Distribution of the measured end-to-end distance of the switches in the open (left), closed (middle), and re-opened state (right). All distances were measured in TEM micrographs. Re-opening of the closed structures results in a distribution almost identical to the open state. All three distributions were fitted with a lognormal distribution (solid lines).  $\text{median}_{\text{open}} = 130$  nm;  $\text{median}_{\text{closed}} = 33$  nm;  $\text{median}_{\text{re-opened}} = 130$  nm.

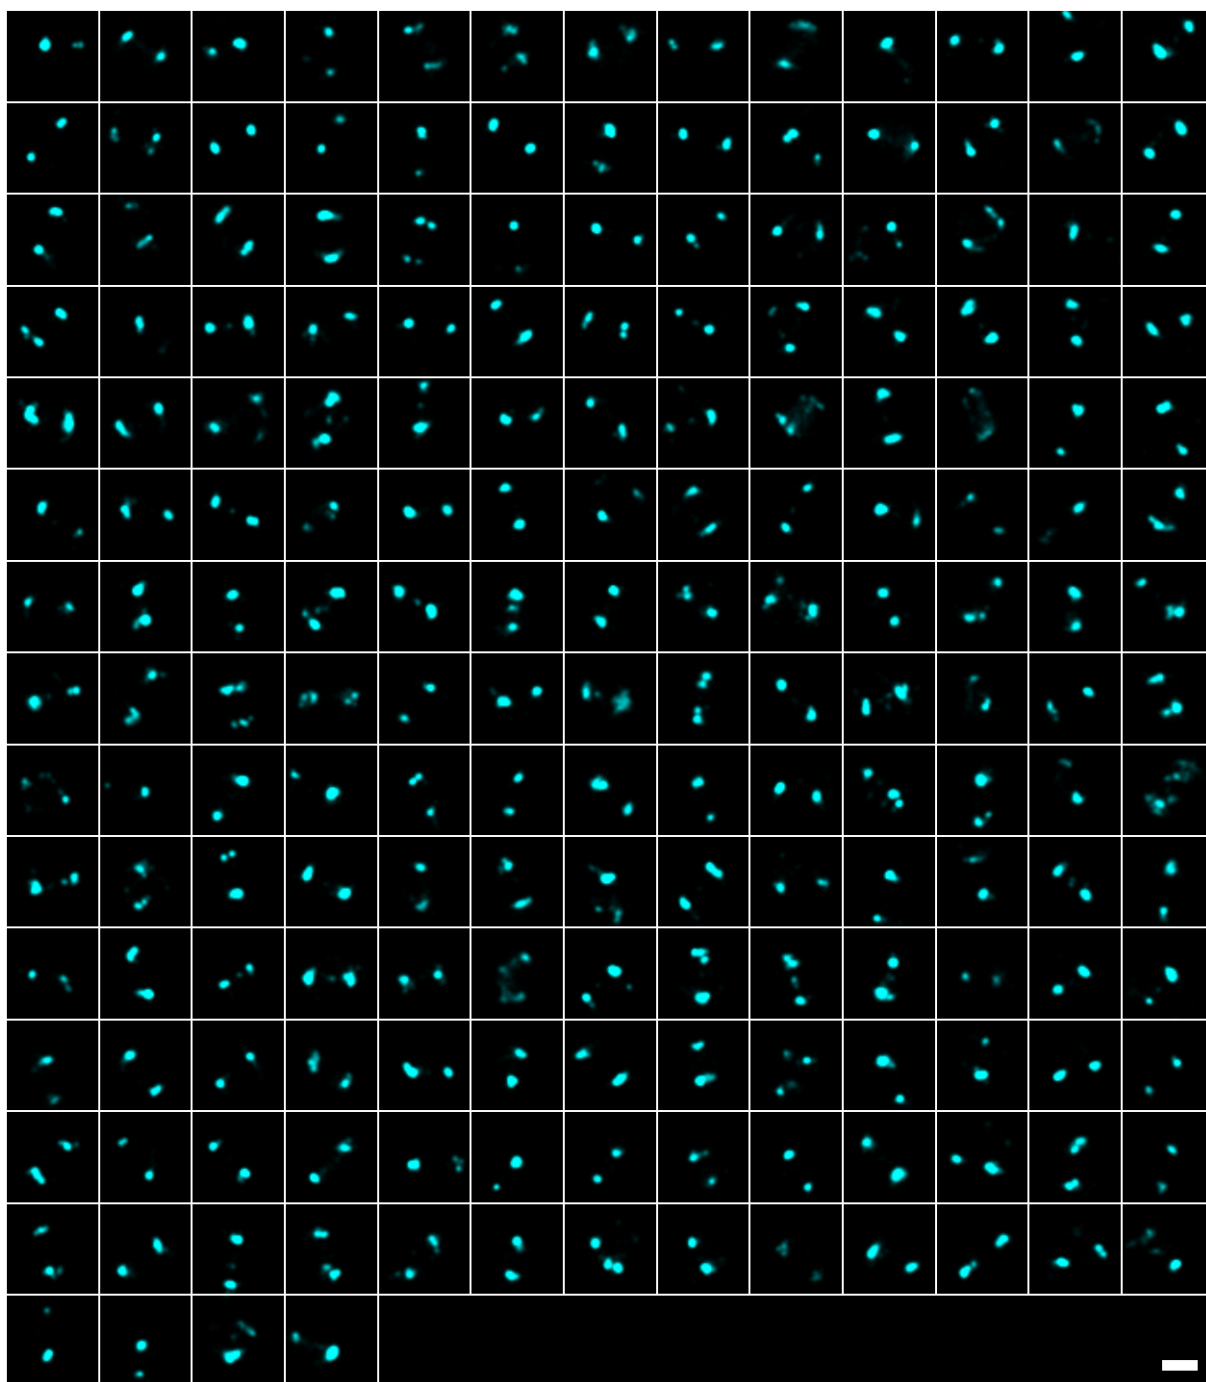

**Figure S10.** A set of 186 individual switches in the open conformation. Scale bar is 100 nm.

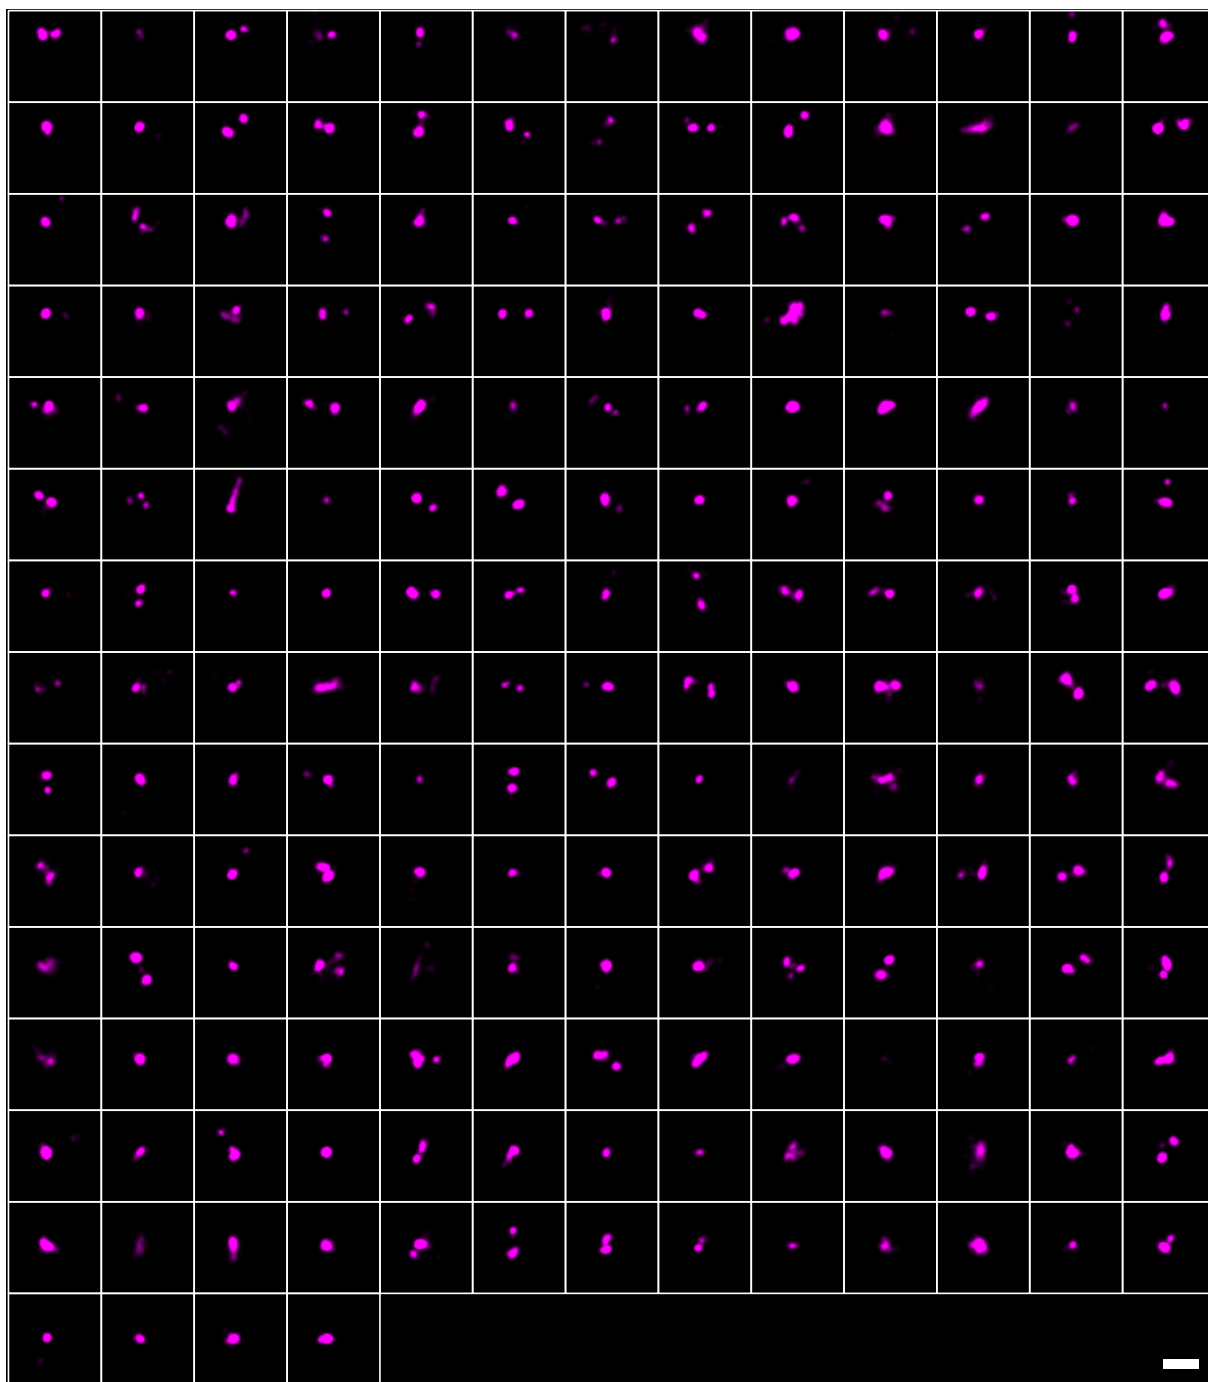

**Figure S11.** The same set of 186 individual switches after switching to the closed conformation.

Scale bar is 100 nm.

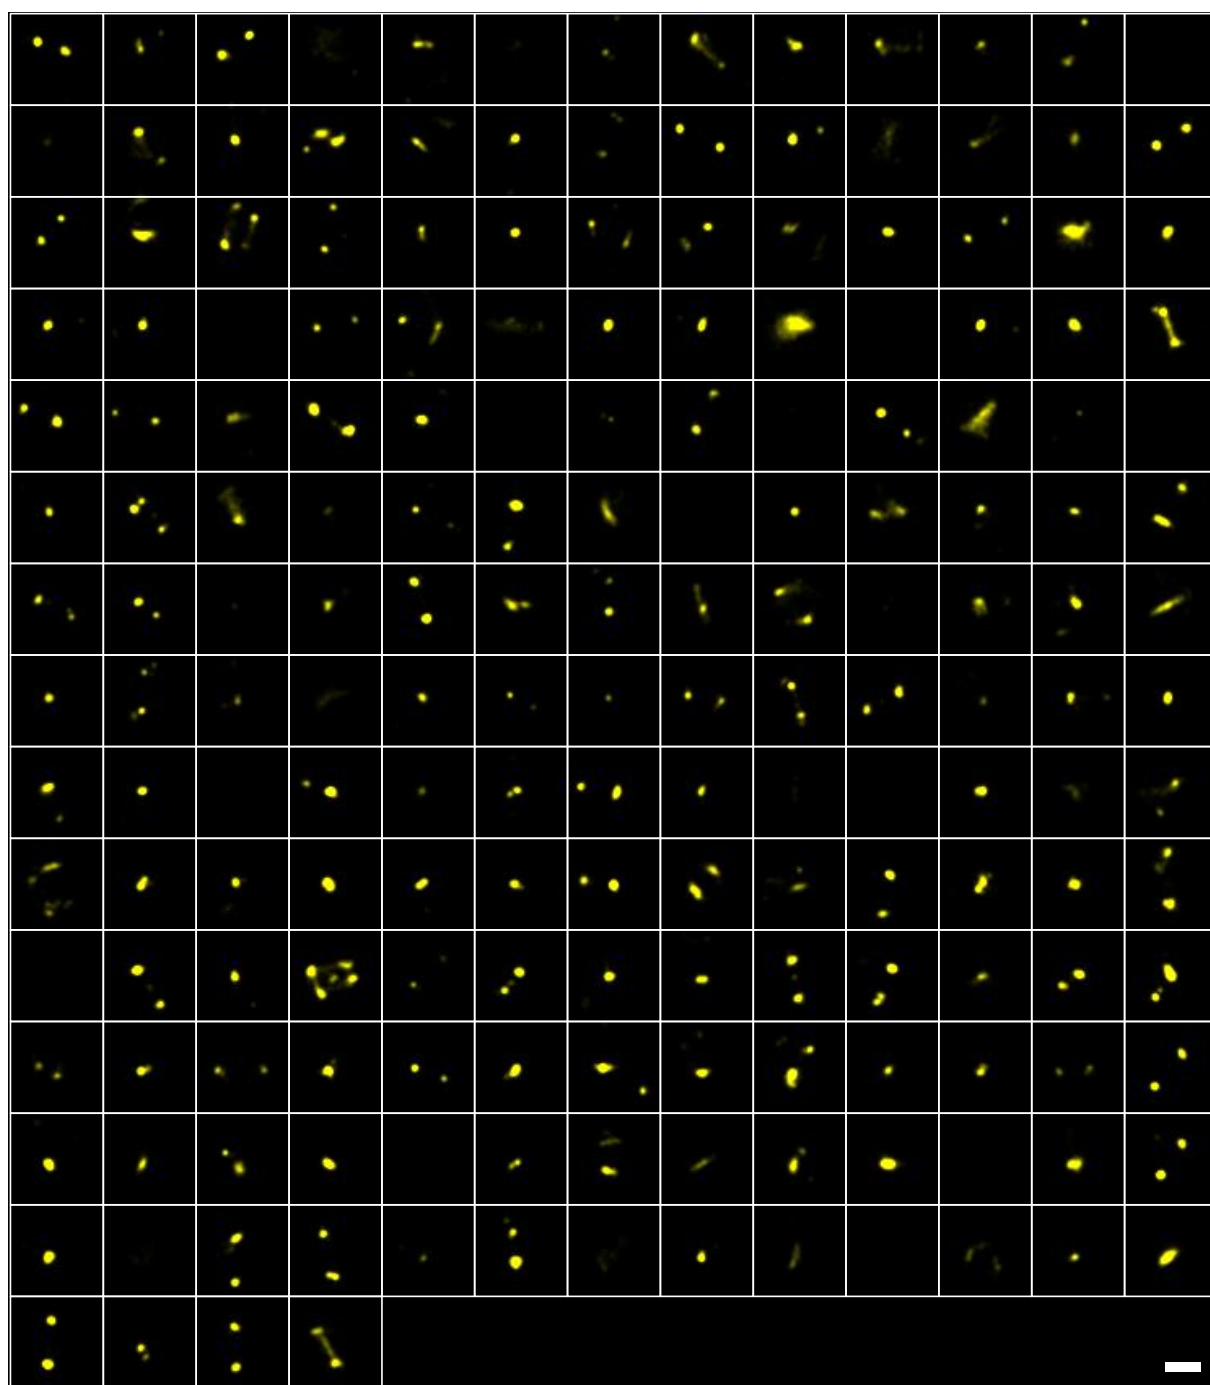

**Figure S12.** The same set of 186 individual switches after switching to the re-opened conformation. Scale bar is 100 nm.

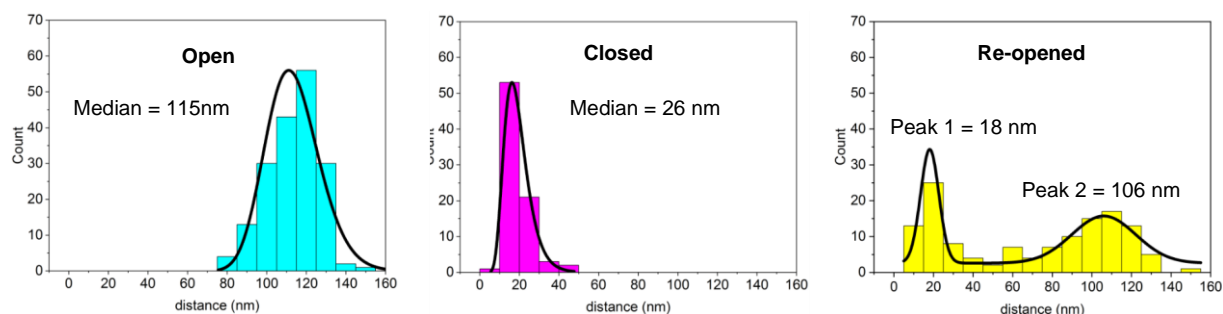

**Figure S13.** Distribution of the measured distance of the switches shown in figures S10-S12 in the open (left), closed (middle), and re-opened state (right). We computed the distances in the DNA-PAINT data by first fitting the localizations with either a bimodal gaussian distribution (for all switches with two distinct spots visible) or with a single gaussian (for all switches with only one spot visible). We then either measured the peak-to-peak distance of the bimodal gaussian distributions or took the FWHM (full width at half maximum) of the single gaussians as the distance value.

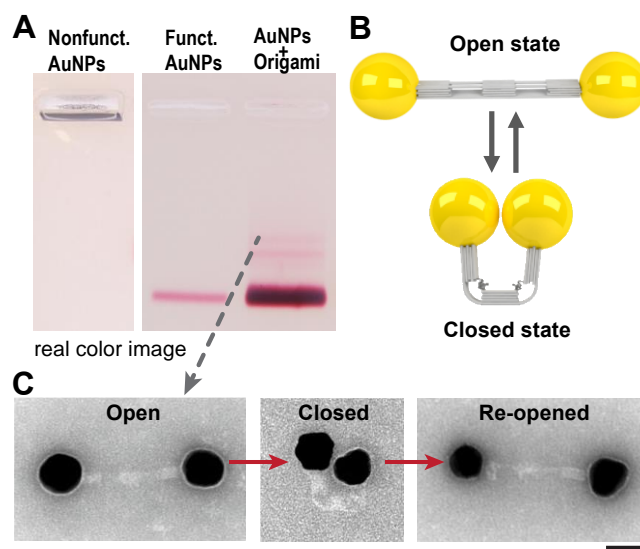

**Figure S14.** AuNP attachment to the switches. (A) Agarose gel electrophoresis for the purification of DNA origami switches carrying AuNPs from excess AuNPs. The band containing the switches with two AuNPs was cut and the correctly assembled structures were extracted. (B) Schematics showing reversible switching between open and closed states of the switches carrying two AuNPs (C) TEM analysis of open, closed, and re-opened states of the switches carrying two AuNPs. Scale bar: 50 nm.

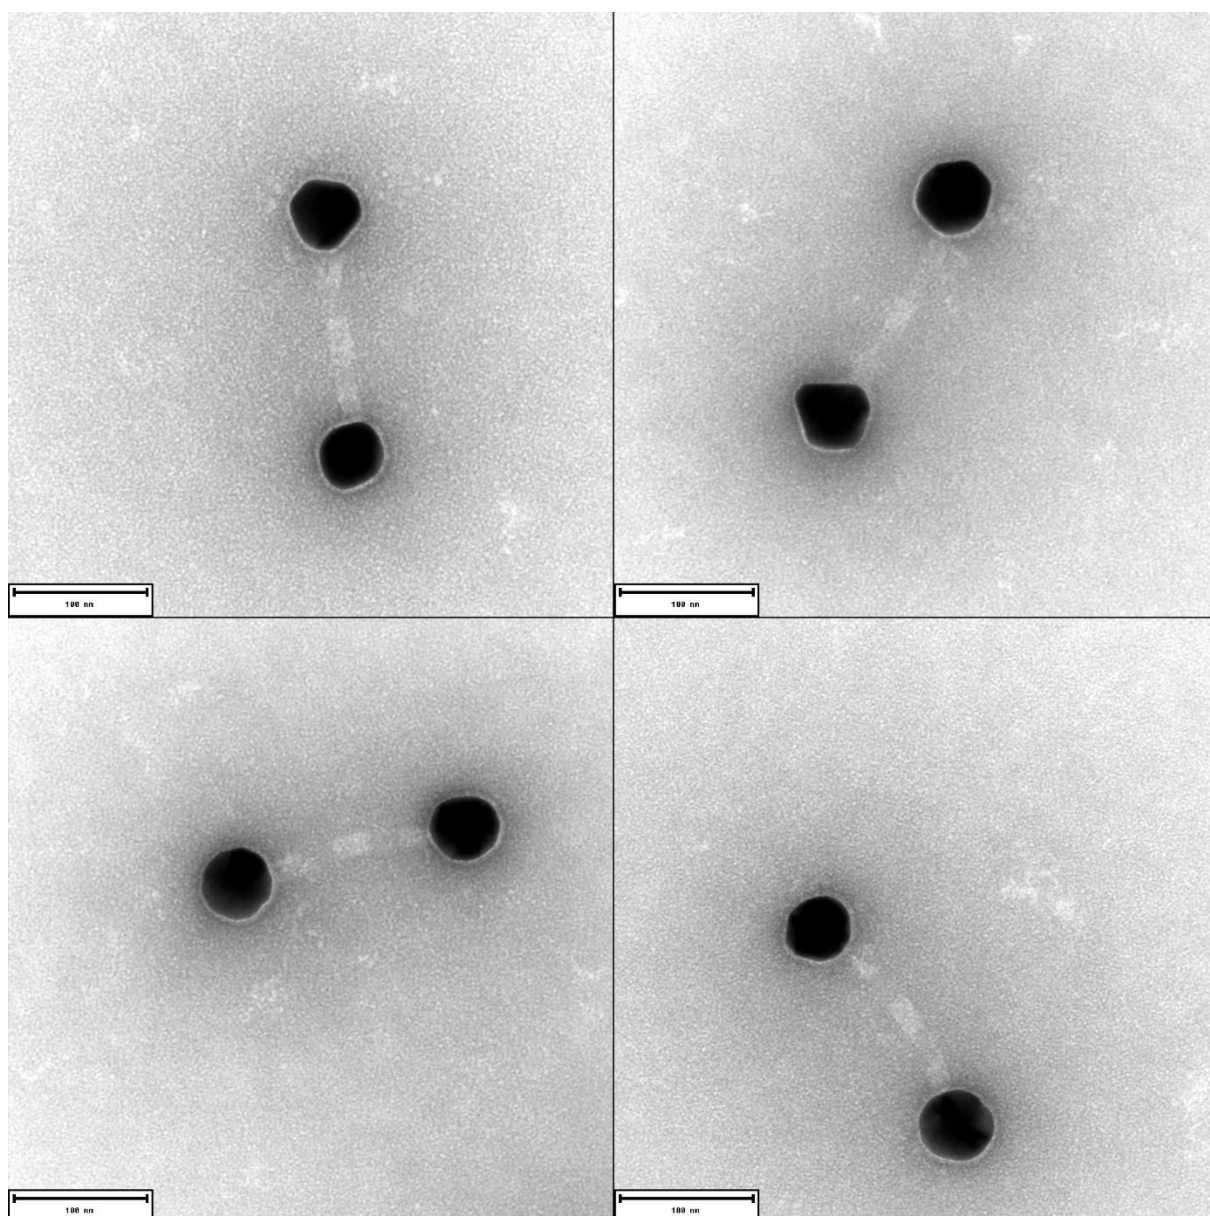

**Figure S15.** Exemplary TEM micrographs of the switch with AuNPs in the open state. Scale bars: 100 nm.

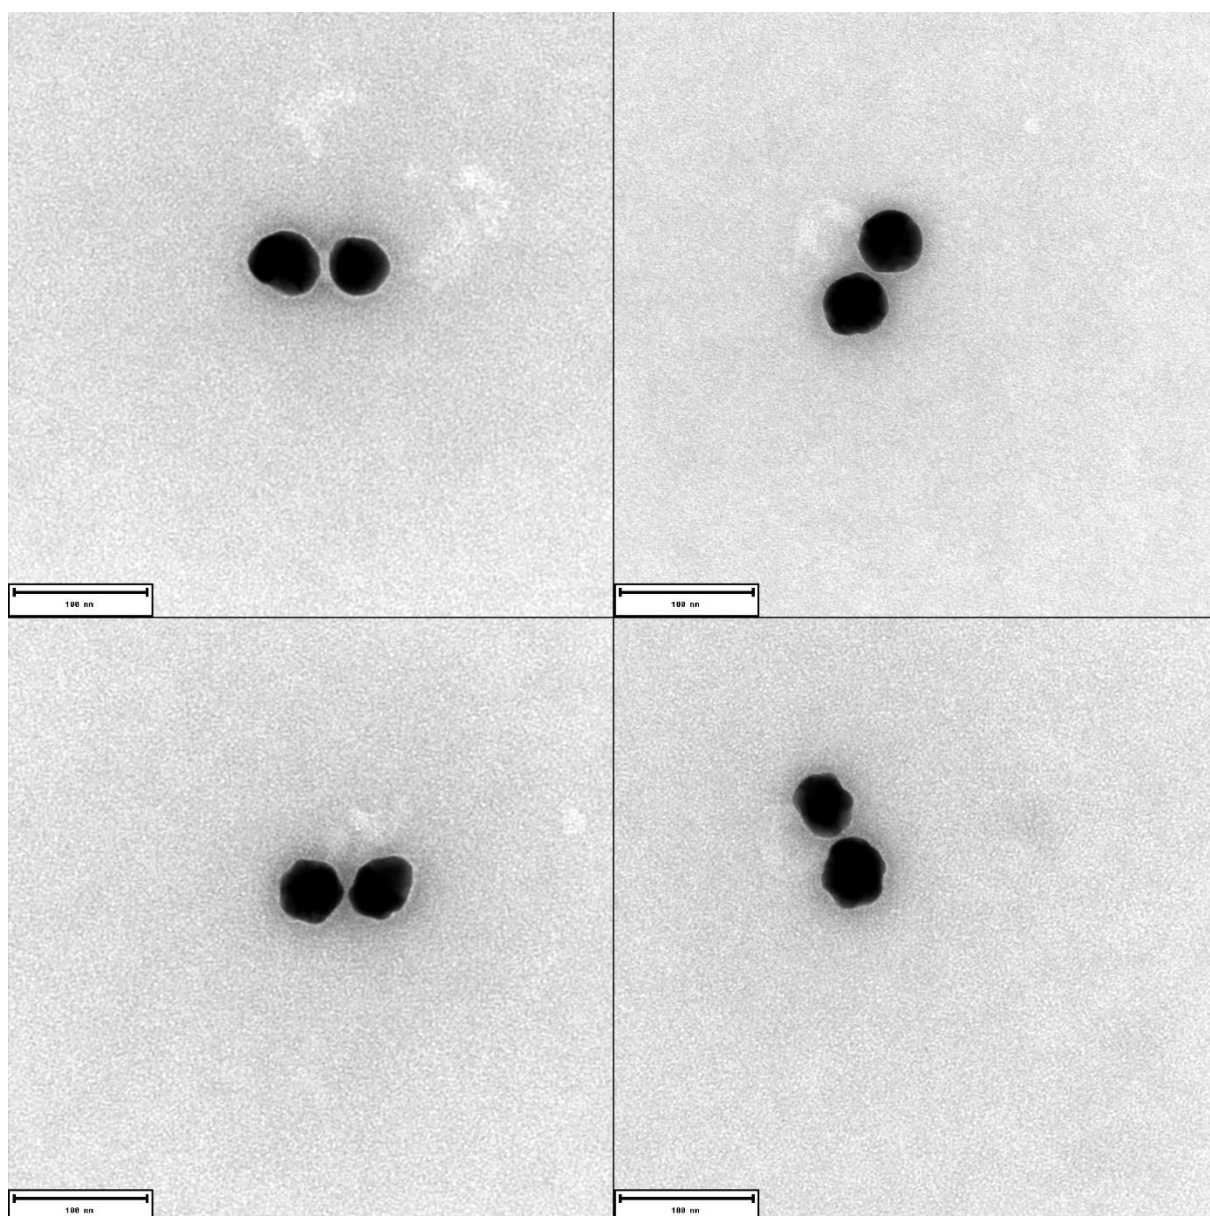

**Figure S16.** Exemplary TEM micrographs of the switch with AuNPs in the closed state. Scale bars: 100 nm.



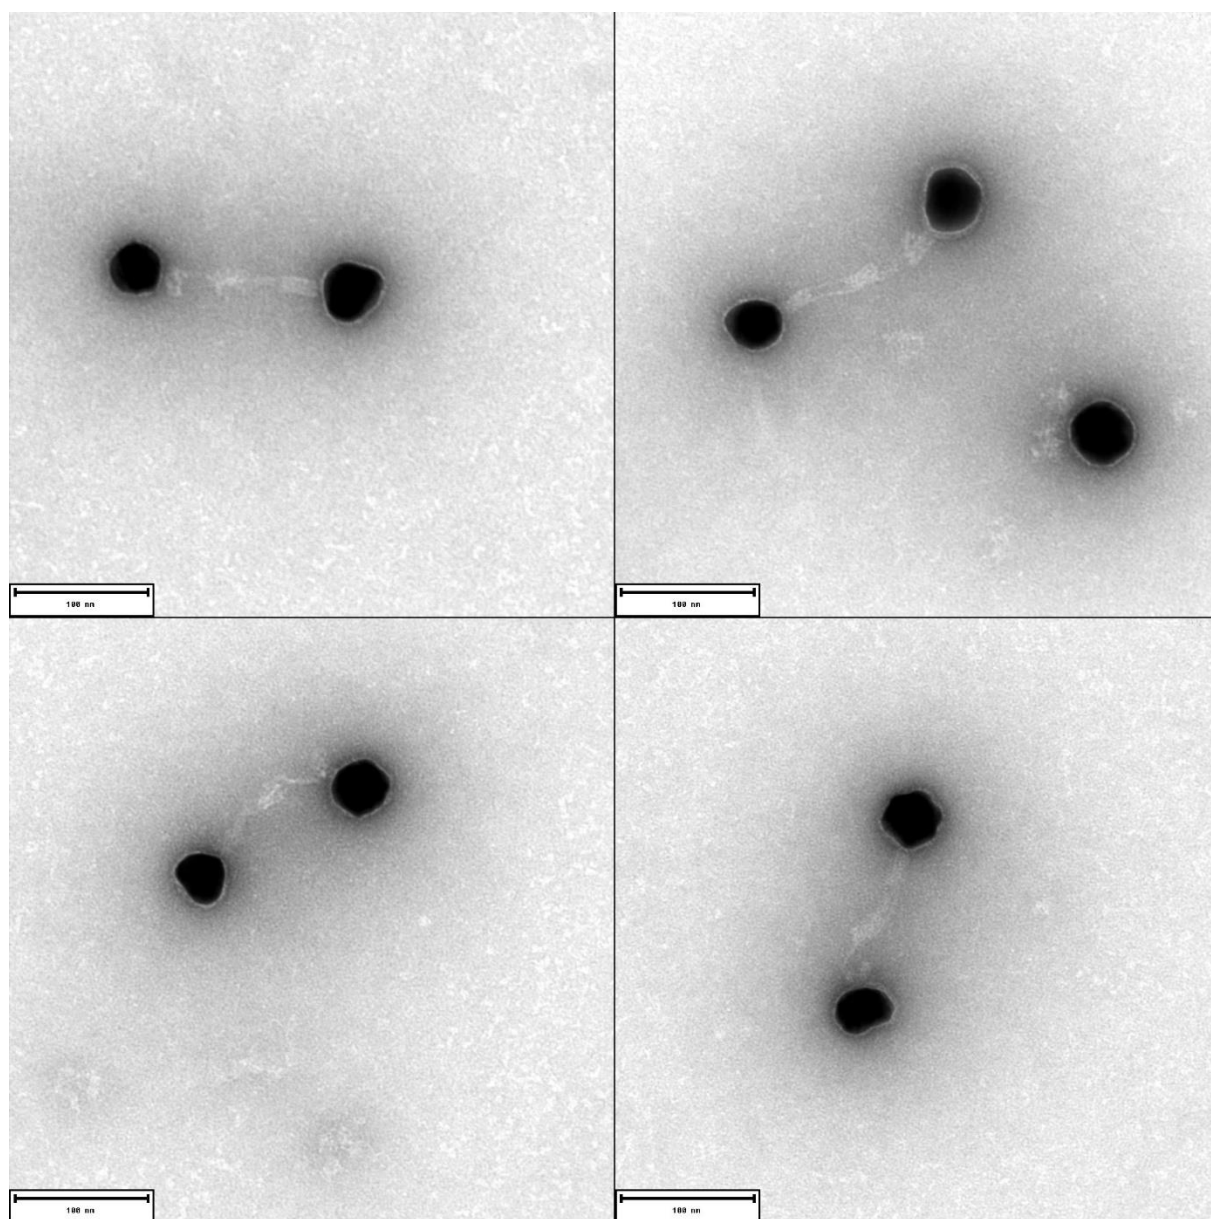

**Figure S17.** Exemplary TEM micrographs of the switch with AuNPs in the re-opened state.

Scale bars: 100 nm.

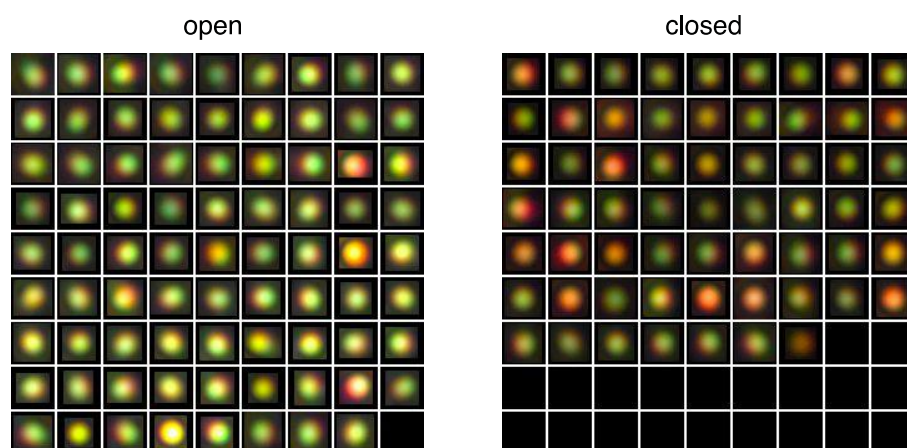

**Figure S18.** All analyzed single particles for the open state (left) and closed state (right) that were used for the RGB intensity distribution plot in Figure 3D in the main text.

**Supporting Information Text S1: Entropic force of the ssDNA-segments**

We modeled the ssDNA-segments inside the structure with a modified freely-jointed chain (mFJC) model. Specifically, we used the force-extension behavior of ssDNA described by Smith et al.<sup>[38]</sup>:

$$d(F) = L_C * \left[ \coth\left(\frac{Fl_K}{k_B T}\right) - \frac{k_B T}{Fl_K} \right] * \left(1 + \frac{F}{S}\right)$$

with  $S$  being the stretch modulus and the contour length  $L_C$  being the number of nucleotides  $N$  of the ssDNA times the length per single base  $L_B$ :

$$L_C = N * L_B$$

We used the following parameters to calculate the resulting entropic force for a fixed end-to-end distance  $d$  ( $d$  is given by the structure design as described in Figures S1 and S2):

| Parameter | Value                                 |
|-----------|---------------------------------------|
| $L_B$     | $6.3 \text{ \AA} \pm 0.8 \text{ \AA}$ |
| $l_K$     | 1.5 nm                                |
| $S$       | 800 pN                                |
| $k_B T$   | 4.114 pNnm                            |
| $d$       | 29.92 nm                              |

The resulting force for each individual ssDNA-segment was calculated to be 5.56 pN. Since we have always two parallel ssDNA-segments connecting the three blocks in our design (see figs. S1 and S2 for design schematics) we can multiply the calculated force per individual ssDNA-segment by a factor of two. This gives us an effective force of around 11 pN acting on each of the three blocks pulling them towards each other.

**Table S1: nonlinear thermal annealing ramp for DNA origami nanostructures**

| Temperature (°C) | Time (min) | Temperature (°C) | Time (min) |
|------------------|------------|------------------|------------|
| 65               | 5          | 44               | 75         |
| 64-61            | 3          | 43               | 60         |
| 60-59            | 15         | 42               | 45         |
| 58               | 30         | 41-39            | 30         |
| 57               | 45         | 38-37            | 15         |
| 56               | 60         | 36-30            | 8          |
| 55               | 75         | 29-25            | 2          |
| 54-45            | 90         | 4                | storage    |

**Table S2: List of oligonucleotides used for the DNA origami nanostructures**

| Name | Sequence                                          | color |
|------|---------------------------------------------------|-------|
| Core | AGTATTACGAAGGTGTTTGTTCGCCTAAAAGGG                 |       |
| Core | TAGCTTCAAATATCGAGGATTAGAGACCAATT                  |       |
| Core | CGCGAGAAAGGAAGGAAGCGATTTAGAAAAC                   |       |
| Core | ACCGATCGCTGAGGCCGATTAAGAATAGCGGAACAAGCACCC        |       |
| Core | TTTCTTGTATCTCGGAATCGCCATTA AAAATGCTGAGAG          |       |
| Core | AAGCCCGAAAGACTAAAGAACTCTAAAGTCTG                  |       |
| Core | GTTGAAAATCTCCAAGGTGAATGGCGC                       |       |
| Core | AAAAAGAAAGGAACAACCTAATGCTAAACAAATG                |       |
| Core | TATTGCTGGGAAGACTTCTTACTGCTCAAACA                  |       |
| Core | TAAGTCTTTACCCCTGATTTTGTAAACTATCAGAGC              |       |
| Core | CAGGGAGTCGAGGGTAGCCACAG                           |       |
| Core | GAGTATTACCTGTTATGTAAAAG                           |       |
| Core | ATCAAAAATCAGATCAATCAGAATCGCGGGGACCATCAATGAAAAGA   |       |
| Core | CAGCATCGGAATAAAGGCCAAATCAAAAAGGGATTAAGGGCGAAGCT   |       |
| Core | CTGGTTTGTGGGATTTAGGAATGTCCACAGATCAGAGCGCCCA       |       |
| Core | TGTGCCTTTACATAAATGAAGCGGCAGAGCAG                  |       |
| Core | TCATTGAATCCCCCTGACCATAA                           |       |
| Core | GCGGTAACGGCTACAAATACGTAGAAGGCACCAACCTACTCA        |       |
| Core | TTAGAGTCCATTGCTGTGAAGGTTTATAAGTAATCCTTT           |       |
| Core | GCAATGCATGACGACGGTAAACACCCCATCTGCAATGTG           |       |
| Core | ACCCTGTAATACTTTTGAGCATAA CTGCTACTCAAT             |       |
| Core | CGCCAGGGTGGTTTGAGAGAGTGGAAAGCATTTTC               |       |
| Core | GTTATATTCCAATACCGTTAAGACCCG                       |       |
| Core | CGTGAGCAAAAAGATAGAAGGAGCCGACAGG                   |       |
| Core | CAGAGGGGGTAATAGTAACAATCCTCGCACAAAGCCCAACGCCAT     |       |
| Core | GGAGAGGCGGTTTGCGTACGAGCCTGCAGCAA                  |       |
| Core | TTTCCTGTGTGAAATGTTAGAGGACTAAAAGA                  |       |
| Core | CAATCCACACAACATATACTACATGCCTGGG                   |       |
| Core | TCGGGTTTCAAAGGAGAGTGAG                            |       |
| Core | TCCTGTTGATGGTGAGAGCCACAGTC                        |       |
| Core | TGTAAGCCCAATTGTAGCATTAAAG                         |       |
| Core | AATAAAGTGTATAGGTGTAGGCGGATATCCTCAAGAGA            |       |
| Core | TAGTAACTTTTATTCACCCGCTGGCCCTTTCTTTTC              |       |
| Core | ATAACGCTTTAGAGATCGGTTTTTAAAGAAA                   |       |
| Core | GAGCAAACGGTTGATATACAGGCGGTTGTACCAAATAT            |       |
| Core | ACATTCCTTATCTGGTCAGTTGGATCTAGAT                   |       |
| Core | TAGGGCGCTGGAGCACTAAGTGAACCATGGCTTTTAAACGGGGTGCCGC |       |
| Core | CCAGCAGACAATAACGGATCGCATTCACCCATTAGCCAAATCAA      |       |
| Core | AGTGCCACACCGAACGACCAAGTAAATCCGCTAACAGTAG          |       |
| Core | AACAGTTGATTCGTAATGCTGAGGTATCGC                    |       |
| Core | TGACCCCTCATCAAGAGTAATCTTGCCGAAAAGAGGCTATCAGG      |       |
| Core | TTTTTGGGGTCGAGGTGCCGTAAACAAGTGTAGCTTTCTCTCC       |       |
| Core | TTACCTTTAATTTGCCATTCTCAT                          |       |

|      |                                                  |  |
|------|--------------------------------------------------|--|
| Core | CGTACAGATGGAAGTGAACCTAGCACCATTACC                |  |
| Core | GCGATGGGGAGCTAAACAGGAGGCTTTTCAC                  |  |
| Core | CTACATCGGAACAAGCGCAGTCTCTGAATTCACAAACAGCATTG     |  |
| Core | CTAATAGATGTGAAAAATGACCGTATTTTGGA                 |  |
| Core | TCGCATTGGCCTCAGGAAGAGATCCTTCTAAGAACGC            |  |
| Core | CAGGCTGTAGCCACTTGCCCTGAGTAGTATTTTCAACATCCAA      |  |
| Core | GCCAGGAACCCTAAACAGTTAATGCCATTTTCGGAAATCA         |  |
| Core | CCGTCAATTCGTATTACTAATGAAAGGCACTG                 |  |
| Core | TATGATATCGAGGTGTAGATGGGGCTTATC                   |  |
| Core | TCACCATGTTATTGTGTGCGCCACCGTCACCGACTTGA           |  |
| Core | CGTTATTACATTGCGATTAGTAACCTGGAGGTCAAGCACTGAAACCAG |  |
| Core | GCCCCAAGTTTGGATTATACATTATATTTTAATG               |  |
| Core | GGAGACAGTCAAAATCATTATTGAAACCTCACATTATG           |  |
| Core | CTCAGGAGGGATAGCACCCAGCAAGGGTTGACGAATAATAATTTTG   |  |
| Core | GGAAAAGCCTGGATCGGCCAACGCGCGG                     |  |
| Core | AGGATCTGGAACCTTATTAACCTCTCGCAAAATCCATCGAT        |  |
| Core | ATTAAATGCAAAAATAATAGGTC                          |  |
| Core | ATATATTTTAAATGCAATTTTATATCTGAAAGCTAAATAAGGCAAA   |  |
| Core | TCTTCCTCAGAACTGATAAACTTAGCCGAAATCACCAGTGTA       |  |
| Core | CAGCGGGGGTTTTGCTCAGTACCATCACCCTA                 |  |
| Core | AGGAACCGGAACCTCATAGCCCTTATTTCATCGGCCCTG          |  |
| Core | GGCGTCGACAACAGATAATATCAGATGATGCTGAATACGAGGA      |  |
| Core | ACGTTGGCACAATTACCGCCCAATAGCAA                    |  |
| Core | ATAATGGGAATAACCTTGCATCATAGTCTTGGGTTAT            |  |
| Core | CCTACTGGTAAGTGTGTTCCAGTTTCCGAGATGGCGAAAA         |  |
| Core | TTGCGAGAAATAGAATCTGCCACTCTCTGA                   |  |
| Core | AAGATTCAAGGAATTATCAACCGTTCTAGCTATGTACCCCAAGAGAA  |  |
| Core | CTTTGACCTGCTTTTTCAGGTTTAGTACCGCCACTGACCCC        |  |
| Core | TTTCAGGTTTAAACGTCCGGGAGAACAATGAA                 |  |
| Core | TATACCAGTTATTACAATATAATGTCATTGCCTGAGAAT          |  |
| Core | AGCTTTATTATTTCAAACATAGCGATAGCAATTTATC            |  |
| Core | GTCACGACGTGTACGTTAAATAAGAATAACGTGTGAT            |  |
| Core | CGATTAAGTTGGGTTACTAGAAAAAGCCT                    |  |
| Core | CCAGCTGGCGAAAGTTATCAACAATAGATAAATAAACA           |  |
| Core | GGGCGATCGGTGCGAATAATATCCCCAACCTCC                |  |
| Core | TAAGAACTGGAGGGTTTTGAAGCCTTAACAATTTTA             |  |
| Core | CTTTAATCATGTGAACACCCTGAACAAAGACGGGAGA            |  |
| Core | GTAAATTGGGCTTCGCTAATATCAGAGA                     |  |
| Core | GCTTGCCTGACGATAAAGTGGCAACATAATTACGCA             |  |
| Core | AGACAAGAACCCTGCGATAGCAGCACCGAGCGTCAGCCAA         |  |
| Core | AAATTCTGTAATCGTCGCTATTCCT                        |  |
| Core | CAATAGTGTAGATTACATCATGTGCATGCGTCTGCAAC           |  |
| Core | CAGGTATCATATGCGTTATACAAATTTCTGAA                 |  |
| Core | CAGCTAATCAAGATGAACAACATCAGGACGTTCCATAT           |  |
| Core | ATTAAGTGTACAGAGAAATAACATGAAATA                   |  |

|             |                                                               |              |
|-------------|---------------------------------------------------------------|--------------|
| Core        | ATTAGCAAGGCCGTAAGTTTATTTCCAGCGCC                              |              |
| Core        | AGTTTGCCTTTTAAATCAGTAGGAGTGTAGAATGGACCTAAAGG                  |              |
| Core        | GTATAAAGCCAACGCTCAACGTAAGTAATTAGCTAATG                        |              |
| Core        | CGGTATGAATCTTACCTGCCAGTT                                      |              |
| Core        | GGTAATAAGAGCAAGAACAATGAAATAAA                                 |              |
| Core        | GAACTGGCGCAACGCTAGACCCACAAGAATTGAGTTAAGC                      |              |
| Core        | GCGCGTTTAGCGTTTGAATCCGAGCATTATACCAAGC                         |              |
| Core        | GCTTAGGTGAGAGACTAGGCTATAGAATTACAACATAACA                      |              |
| Core        | AAACCAAGAATCAATAATCGGCTGCGAGCATGT                             |              |
| Core        | GCCTAATTAACGCTAAACGCCAATCAGTTGAGCTAT                          |              |
| Core        | ACCGATTGAAATTCATATGGTTTATGTACAAT                              |              |
| Core        | TATATGTAATGCTGATTGTCGGACGTGT                                  |              |
| Core        | AATTTAGGCAGAGGCCACCAAAAAGAGTAGGGCTTAATTGAG                    |              |
| Core        | AGCCAGTAATACCGCACTCATCGAGCGGGTATT                             |              |
| Core        | GTAAGCAGATAGCCGAACAAAGTTTCGGAATACCCAAGCAATAG                  |              |
| Core        | GGAAACCGAAGGGAGGGAAGGTAAGACATTCA                              |              |
| Core        | TTTTCATAATCAAATCTTAGGATTATTTTCGGAACCTATT                      |              |
| <b>Name</b> | <b>Sequence</b>                                               | <b>color</b> |
| End staple  | TTTTCAGCAAAATCAAACCTCGTGTGAGCTTGAAATTTT                       |              |
| End staple  | TTTTAGATACATTTTCGCAAAATTTAGTTTGACCATTTTTT                     |              |
| End staple  | TTTTTTGTATCGTTTTATCAGCTTGCTTTCGAAAAAAGGCGTTAGAACAGCCCTCACAAAC |              |
| End staple  | TTTTGCAACGAAGTCCGTGAAGAGCGGCACTGGTGACCTGGAAGAGTTTTT           |              |
| End staple  | GGAAACTGCAACGAGCGCAGAAGATAAAACAGAGGTGTTTT                     |              |
| End staple  | TTTTGATTGCATCAAAAAGAAGTCAGAAGCAAAGCGTTTT                      |              |
| End staple  | TTTTCGCCACGCATGGGATCGTCACTTTT                                 |              |
| End staple  | TTTTACATCAAAACGCCCGGAGAAGAAACCAGCAATTTTT                      |              |
| End staple  | TAGCATTATTTGGGGCGGAGCTGAAAAGGTGGCATTTTT                       |              |
| End staple  | TTTTTCAATTCTACTAAAATTAAGCATTTT                                |              |
| End staple  | TTTTGGAGTGAGAATGGAGCCTTTAATTTTT                               |              |
| End staple  | TTTTTCTGCGGCAGTTAATCGAACTAGCTGAAACGACATACATTGTTTT             |              |
| End staple  | CTGCTGGATGAACGGCCAGGAGATTCGCGTCTTTCACAGCTTTT                  |              |
| End staple  | TTTTTTCAGAAAACGAGAATCAAATGCTTTAAACAGTTTT                      |              |
| End staple  | GAATTAGCAATAGTAGTCGATGAACGGTAATCGTATTTTT                      |              |
| End staple  | TTTTCTCAGCAGCGAAGACTTTTTCTTTTT                                |              |
| End staple  | TTTTACCTTTTCCATGAATTTGGGGATTGACGCGATTTTT                      |              |
| End staple  | TTTTATAAAGCCTCAGCGGGAGAAGCCTTTTTT                             |              |
| End staple  | TTTTGCTGATTGCCACAGTTTCAGCTTTT                                 |              |
| End staple  | TTTTCAAGGAGTTTATATGTGCAGATTTTT                                |              |
| End staple  | TTTTCTGGATAGCGTCCAATACGCGGAATCGTCATAAAAAGTTTTGC               |              |
| End staple  | TTTTATGAGGAAGTTTCCATTAACGGGTAAGAGGCTTTCCGCTCA                 |              |
| End staple  | ACCAGTGAGACGGGCAACATTTTT                                      |              |
| End staple  | TTTTTCGAAGTGAGCGAAATCAGTAAACAGAGAGGTTTTT                      |              |
| End staple  | TTTTTTATTTCAACGCAAGGATAAAAATGCCTGGAAAGGCC                     |              |
| End staple  | TTTTCCAGCTGCATTAATGAGGTGCTAATGAGTGA                           |              |
| End staple  | GCATACAAATCAATGTAATGAGTATCAATGAG                              |              |

|            |                                                             |  |
|------------|-------------------------------------------------------------|--|
| End staple | TAAACCCAATATTACATAAAATGTTTAGATTTT                           |  |
| End staple | TTTTGATGCCAGAGTCGTAGTGCATTTGAGGATTAGAAGTTTTT                |  |
| End staple | CATGATAAAATCTACAAAGGATTTAGGAATACCACATTTTTT                  |  |
| End staple | TTTTAAACTAGCATGGCGGGTTTTGT                                  |  |
| End staple | TTTTAATATTTAAATGTGAAGAAGATTGATAAGCATTTT                     |  |
| End staple | TTTTCAAATCCCTTATGCTTTTGCAACCGATATATTCGGTAGTTG               |  |
| End staple | ATTGGCAGATTCACCAAGGAATGAGGAAGGTTATTTTT                      |  |
| End staple | TCTTTGATTAGTAATAACATTCAACATGAAGTTTCATTGGGAAGAAAAATCTACGTTTT |  |
| End staple | CGAGCACGTATAACGTGCGGTACGCTGCGCGTTTT                         |  |
| End staple | TTTTTGCGCGAAAGCATCACCTTGCTTTT                               |  |
| End staple | TTTTCAGACCGGAAGCAAACCTCTGGTAATATCCAGAAC                     |  |
| End staple | GGTCCGTTTTAATTCGAGCTTCAAAGCGAATTTTT                         |  |
| End staple | TTTTGCGAACGTGGCCGACAATGACAACAACCATTTTT                      |  |
| End staple | AAATCTAACTGATAGCGAGATAGAACCCTTCT                            |  |
| End staple | TTTTAGCGGTCAGTATTAACACCGATTAACCAACAGTTCAGGGTTTT             |  |
| End staple | TTTTAAAGTACGGTGTCTGGTTTTAAATATGCAACTTTTT                    |  |
| End staple | TCAAGGCCAACACCTAAAACCTGGGAGTAAGCGTATTGCTAAACTGGAAATTTTT     |  |
| End staple | TTTTTCATTTTTGCGGATGGCTTGGCCTTGCAACA                         |  |
| End staple | TTTTGACTCCAACGTCATTAGACAGGAACGGTACGCC                       |  |
| End staple | TTTTCTAAAATATCTTTAGGAGCGCGCAACACAGCAATAAAATTTT              |  |
| End staple | TTTTGCTATTTTTGAGAGATAATGCCGGAGAGGGTATTTT                    |  |
| End staple | TTTTTCATTTTTTAACCAATAGGAAAAACAGACGTTAATACTATTATTTAAGAGG     |  |
| End staple | TTTTAACCGCCACCCTCGTTCGGAATCGGTTTT                           |  |
| End staple | TTTTATTAGACTTTACAACAATATCCGATAGATGAACGAAGTTTT               |  |
| End staple | TTTTAGATTCAAAGGGTGAAGTAATGTGTAGGTAATTTT                     |  |
| End staple | TTTTTTATCATTTTGCGGAACAAGAAACCACCTGGGC                       |  |
| End staple | TTTTGTAGCCAGCTTTCATCAAC                                     |  |
| End staple | TTTTAGAATACACTAAAACAACAAAGAGGCAAAATTTT                      |  |
| End staple | TTTTACGCCTGGTCTCAGGGTGCAAAATCCAACCTCCG                      |  |
| End staple | TTTTCAGACGACGATAAAAACCATATCCATTTCCAGA                       |  |
| End staple | TTTTAAGAGGCTGAGACAGTCCGTCGAGAGGGTTGTTTT                     |  |
| End staple | TTTTCAATTCATCAATATAAGATTATCAGATGATGGTTTT                    |  |
| End staple | TATCATAACCCTCGTTACTTTTT                                     |  |
| End staple | TTTTTTTGTATCATCGCCCGCCACCCTCAGTTTT                          |  |
| End staple | ATTCTGAAACCGCCACCAGAGCCACCACCGGAACCGCCTCCCTTTTT             |  |
| End staple | TTTTATGCGCCGCTGAACCACCCTTTTTAGAAGAGT                        |  |
| End staple | TTTTCAACTAATGCAGATACATACGAGCGTCATTTGCACC                    |  |
| End staple | TTTTAACAGTGCCGTAATGTACCGGCC                                 |  |
| End staple | TTTTAATTTATTTGCACGTAAAACAGAAACAATGGGTCAA                    |  |
| End staple | TTTTGTTGAGGCTAATTTATCTTTTCCTTATTCAGA                        |  |
| End staple | TTTTACGGTCAATCATAATTAAGAACGTGTTTT                           |  |
| End staple | TTTTTAAGCGTCATACATCACCATAACAACATAGTTAGACGT                  |  |
| End staple | TTTTACAGTACCTTTTACATAGATGAAT                                |  |
| End staple | TTTTTGCCGGAACAGGCACCGCACCGCTTCTGGTTTT                       |  |
| End staple | TTTTATAGGCTGGCTGAGGGAAAGCCGTTTT                             |  |



|               |                                                                |              |
|---------------|----------------------------------------------------------------|--------------|
| End staple    | AACGTAACAAAGCTACACCACGGAAGAAACGTCACCAACAGACCAGGCGCTTTT         |              |
| End staple    | TTTTCAGACGATTGGCCTTGATATTACCGTCCAGTTTT                         |              |
| End staple    | TTTTCAGAGGCGAATTATTCATTTTAATTAATTTCAATTACCTGAGTTTT             |              |
| End staple    | GAGGCGTTTTAGCATCGGACGACGAAACCGTGCATCTGCCATTTT                  |              |
| End staple    | TTTTCAACAGAACCATTGAGGCAGGTTTTT                                 |              |
| End staple    | TTTTCAAAGAAGATGATGAAATATAAATCAACAAACATCAAGAAATTTT              |              |
| End staple    | TATAGAAGCGCATCGTACAGTATCAAATTTTGTAAATCAGCTTTT                  |              |
| End staple    | AAAAATTAGAGCCAGCGAACGAGGCGCAGTTTT                              |              |
| End staple    | GCAAACATGATTGACCGATTCTCCGTGGAACTTTT                            |              |
| End staple    | TTTTCAGAGCCGCCACTCAGAGCCGCTTTT                                 |              |
| End staple    | TTTTACAAAATTAATTACATTTAACAATTTTATATATTCCTTCCTGATT              |              |
| End staple    | GGAAATTATTCATTTAAAAGTACAACGGAGATTTT                            |              |
| End staple    | TTAGAATCCTTGGCCTGATGCTTTGAATACCAAGTTACAAAATCGCGTTTT            |              |
| End staple    | ACAGGAGGCCACCAGACAGTGCCTTGAGTTTTT                              |              |
| End staple    | AATCGCCACTTTTTCAAATTTAATGGTTTTACCA                             |              |
| End staple    | CTATCTTACCGAAGCCCAACGTCAAAATAAAAAACAG                          |              |
| End staple    | CTGCGAACGAGTAGTGGTCAATAACCTGTT                                 |              |
| End staple    | GAGCCCCAAAGCGAAGGAGCGTTCTTAAACAGCTTGAT                         |              |
| End staple    | CAGTTGAAGTCACACGAACCACCAAGCGTG                                 |              |
| End staple    | CACTAGGGAACCAACGGTGTGAACCAATATTCATTACCCAAATC                   |              |
| End staple    | GCGAAACAAGGTGAATTATCATC                                        |              |
| End staple    | GTTGTGATTGTGCAAGTTGGAATTATCATCTTGAATTACCTTAC                   |              |
| End staple    | TTTTAAACGGCGTCCAAGAAAACAAGCAAGCCGTTTTT                         |              |
| End staple    | ATAGTAAGAGAGGCTTTTGCAGCGAGTAACAATCGTAGGAATCAA                  |              |
| End staple    | TTTTGATGATACAGCGACAGCAAATAAATCCTCATTAA                         |              |
| End staple    | TTTTTAAATGAAAGATGGCAGAAGACGCTGAAACGACGGCCAGTGCCA               |              |
| End staple    | ACTCCAGTGCGGGAGCTGCGCAACTGTTGGGAA                              |              |
| End staple    | TTTTTTAATAAAAACGAACACTAGTTGCTAATTACCTTATGCGATTT                |              |
| End staple    | GTTTAAACGCGCCTGTGGGGATGTGCTGCAAGG                              |              |
| End staple    | GATAAAAATACATACAGAAACACCAGAACGAGTA                             |              |
| End staple    | AAATAAGGCATCTTCTGACCTAAAATATTTTAGTTAATTTAATCGCA                |              |
| End staple    | ATACCGACACACCGGAATCATAATAACGCCAGGGTTTTCCCA                     |              |
| End staple    | ACATGTTCCGTCCAGACGACGACTAAGAGAAATATAAAGTATTTTCG                |              |
| End staple    | AGAAACCAGTCTTGAACAAGAAAGCCCTCTTCGCTATTACG                      |              |
| End staple    | CCAAAAGCGCATTAGTCAGAGGTAATTGAGGAGATGTTTAATTTCAA                |              |
| End staple    | GTATGTTAATGATTAAGACTCCTTGGAACGCAATAATAAACAGAA                  |              |
| End staple    | CAATAGATAAAAAGAAACGCAAGGCTCATTCAAGTAATAAG                      |              |
| End staple    | GCAGCCTTATCCAATAAGAAACGATTTTTTGTTTTTTTAAGAAAA                  |              |
| End staple    | GCCATTTGGGGACAAAAGGCTATTGAC                                    |              |
| End staple    | AGACAAAGAACGCGAGAAAAATTTAACAACGCCAACATGT                       |              |
| <b>Name</b>   | <b>Sequence</b>                                                | <b>color</b> |
| Biotin handle | CATTCTCCTATTACTACCCGACTCCAGCTTTAAGCGCCATGCTCCTTTTGATAAGAGTTTTT |              |
| Biotin handle | CATTCTCCTATTACTACCTAAGAAGTGGAGGGTTTTGAAGCCTTAACAATTTTA         |              |
| Biotin handle | CATTCTCCTATTACTACCTTTTACCCGTCGGTAATGGGATTCGCGTCTGGCCTTCCTTTTT  |              |
| Biotin handle | CATTCTCCTATTACTACCATAAACGCCATATTATAAATAGCGAGCAACAC             |              |

|                        |                                                                 |              |
|------------------------|-----------------------------------------------------------------|--------------|
| Handle sequence Biotin | CATTCTCCTATTACTACC                                              |              |
| Biotin sequence        | GGTAGTAATAGGAGAAGAATGTT -Biotin-TEG                             |              |
| <b>Name</b>            | <b>Sequence</b>                                                 | <b>color</b> |
| Painthandle            | TTTTTTTGTGCTCTTTCCAGCGTAACGATCTAAAGTATACATCTA                   |              |
| Painthandle            | TTTTCATCGCTATTACGGGGTATCGACATCATTACGATACATCTA                   |              |
| Painthandle            | TTTTTGAACCTCAAATAATACAGTAATACATCTA                              |              |
| Painthandle            | TCAAACCCTCAGGATGCAGGTGAGTATCTATACATCTA                          |              |
| Painthandle            | TTTTTTCGTCACCAGATCAAGTTTTATACATCTA                              |              |
| Painthandle            | TTTTGCATATGATGTCTGACGCTGGATTTTAAAAGTTTGAGTAACAATACATCTA         |              |
| Painthandle            | TTTTATATAAGTATATAACACTGAGTATACATCTA                             |              |
| Painthandle            | CGCCCTCAGAGCCACCACCCCTCAGAACATGAAAGTATTATACATCTA                |              |
| Painthandle            | GAAACAGTACATATGTGAGTAAGGGTTAGAACCTACCATATCAAATACATCTA           |              |
| Handle sequence Paint  | ATA CAT CTA                                                     |              |
| Imager sequence        | C TAG ATG TAT - ATTO 647N                                       |              |
| <b>Name</b>            | <b>Sequence</b>                                                 | <b>color</b> |
| AU mod 1               | CCCCTTTGTGCTCTTTCCAGCGTAACGATCTAAAGTAAAAAAAAAAAAAAAA            |              |
| AU mod 2               | CCCCCATCGCTATTACGGGGTATCGACATCATTACGAAAAAAAAAAAAAAAA            |              |
| AU mod 3               | CCCCTGAACCTCAAATAATACAGTAATAAAAAAAAAAAAAAAAA                    |              |
| AU mod 4               | TCAAACCCTCAGGATGCAGGTGAGTATCTAAAAAAAAAAAAAAAA                   |              |
| AU mod 5               | CCCCTTCGTCACCAGATCAAGTCCCAAAAAAAAAAAAAAAAA                      |              |
| AU mod 6               | CCCCGCATATGATGTCTGACGCTGGATTTTAAAAGTTTGAGTAACAAAAAAAAAAAAAAAAA  |              |
| AU mod 7               | CCCCATATAAGTATATAACACTGAGTAAAAAAAAAAAAAAAA                      |              |
| AU mod 8               | CGCCCTCAGAGCCACCACCCCTCAGAACATGAAAGTATTAAAAAAAAAAAAAAAA         |              |
| AU mod 9               | GAAACAGTACATATGTGAGTAAGGGTTAGAACCTACCATATCAAATAAAAAAAAAAAAAAAAA |              |
| <b>Name</b>            | <b>Sequence</b>                                                 | <b>color</b> |
| DS                     | CGAGAAATGACTGATACCGTGC                                          |              |
| DS                     | AAAATTATTATCAGGATACG                                            |              |
| DS                     | GTGGAACGATACTTGCCCTCT                                           |              |
| DS                     | CTGTACAAAACATATAGATGAT                                          |              |
| DS                     | TTTATGGAGATGATAAATGCAC                                          |              |
| DS                     | TTCCGAGTCACAGGAGATGG                                            |              |
| DS                     | ATCCCCGGGTACCGAGCTCGAA                                          |              |
| DS                     | TTCGTAATCATGGTCATAGCTG                                          |              |
| DS                     | TCGCTGAAATGGATTATTTAC                                           |              |
| DS                     | TACCTACATTTTGACGCTCAA                                           |              |
| DS                     | ACAGGAAAAACGCTCATGGAAA                                          |              |
| DS                     | AATATTACCGCCAGCCATTGCA                                          |              |
| DS                     | AATTAACCGTTGTAGCAATACT                                          |              |
| DS                     | AAAGAGTCTGTCCATCACGCA                                           |              |
| DS                     | TAATCAGTGAGGCCACCGAGTA                                          |              |
| DS                     | AGAATCCTGAGAAGTGTTTTA                                           |              |
| <b>Name</b>            | <b>Sequence</b>                                                 | <b>color</b> |
| TH                     | TGGTATTCGAGAAATGACTGATACCGTGC                                   |              |
| TH                     | TGGTATTAATAATTATTATCACGAGTACG                                   |              |
| TH                     | TGGTATTGTGGAACGATACTTGCCCTCT                                    |              |

|                              |                                |              |
|------------------------------|--------------------------------|--------------|
| TH                           | TGGTATTCTGTACAAAACATATAGATGAT  |              |
| TH                           | TGGTATTTTTATGGAGATGATAAATGCAC  |              |
| TH                           | TGGTATTTCCGAGTCACAGGAGAATGG    |              |
| TH                           | TGGTATTATCCCCGGGTACCGAGCTCGAA  |              |
| TH                           | TGGTATTTTCGTAATCATGGTCATAGCTG  |              |
| TH                           | TGGTATTTTCGTCTGAAATGGATTATTTAC |              |
| TH                           | TGGTATTTACCTACATTTTGACGCTCAA   |              |
| TH                           | TGGTATTACAGGAAAAACGCTCATGGAAA  |              |
| TH                           | TGGTATTAATATTACCGCCAGCCATTGCA  |              |
| TH                           | TGGTATTAATTAACCGTTGTAGCAATACT  |              |
| TH                           | TGGTATTAAGAGTCTGTCCATCACGCA    |              |
| TH                           | TGGTATTTAATCAGTGAGGCCACCGAGTA  |              |
| TH                           | TGGTATTAGAATCCTGAGAAGTGTTTTA   |              |
| <b>Name</b>                  | <b>Sequence</b>                | <b>color</b> |
| SD                           | GCACGGTATCAGTCATTTCTCGAATACCA  |              |
| SD                           | CGTACTCGTGATAATAATTTTAATACCA   |              |
| SD                           | AGAGGGCAAGTATCGTTTCCACAATACCA  |              |
| SD                           | ATCATCTATATGTTTTGTACAGAATACCA  |              |
| SD                           | GTGCATTTATCATCTCCATAAAAATACCA  |              |
| SD                           | CCATTCTCCTGTGACTCGGAAAATACCA   |              |
| SD                           | TTCGAGCTCGGTACCCGGGATAATACCA   |              |
| SD                           | CAGCTATGACCATGATTACGAAAATACCA  |              |
| SD                           | GTAATAATCCATTTCCAGACGAAATACCA  |              |
| SD                           | TTGAGCGTCAAAATGTAGGTAAATACCA   |              |
| SD                           | TTCCATGAGCGTTTTTCCTGTAATACCA   |              |
| SD                           | TGCAATGGCTGGCGGTAATATTAATACCA  |              |
| SD                           | AGTATTGCTACAACGGTTAATTAATACCA  |              |
| SD                           | TGCGTGATGGACAGACTCTTTAATACCA   |              |
| SD                           | TACTCGGTGGCCTCACTGATTAATACCA   |              |
| SD                           | TAAAAACACTTCTCAGGATTCTAATACCA  |              |
| <b>Name</b>                  | <b>Sequence</b>                | <b>color</b> |
| Toehold sequence handle      | TGGTATT                        |              |
| Au handle sequence           | AAAAAAAAAAAAA                  |              |
| Strand displacement sequence | AATACCA                        |              |

**Scaffold sequence:****segment 1:**

CAGCTATGACCATGATTACGAATTCGAGCTCGGTACCCGGGGATCCATTCTCCTGTGACTCGGAAGTGCATTTAT  
CATCTCCATAAA

**segment 2:**

ATCATCTATATGTTTTGTACAGAGAGGGCAAGTATCGTTTTCCACCGTACTCGTGATAATAATTTTGCACGGTATC  
AGTCATTTCTCG

**segment 3:**

GTAAATAATCCATTTTCAGACGATTGAGCGTCAAATGTAGGTATTTCCATGAGCGTTTTTCTGTTGCAATGGCT  
GGCGGTAATATT

**segment 4:**

AGTATTGCTACAACGGTTAATTTGCGTGATGGACAGACTCTTTTACTCGGTGGCCTCACTGATTATAAAAACT  
TCTCAGGATTCT

**M13 hairpin 1:**

GGCGGGTGTGGTGGTTACGCGCAGCGTGACCGCTACACTTGCCAGCGCCTAGCGCCCGCTCCTTTTCGCTTT

**M13 hairpin 2:**

GGGTGATGGTTCACGTAGTGGGCCATCGCCC

**Full p8634 scaffold sequence with segments and hairpins highlighted:**

TGATAGACGGTTTTTCGCCCTTTGACGTTGGAGTCCACGTTCTTTAATAGTGGACTCTTGTTCCAACTGGAACAACACTCAA  
CCCTATCTCGGGCTATTTCTTTTGATTATAAGGGATTTTGCCGATTCGGAACCACCATCAAACAGGATTTTCGCCTGCTGGG  
GCAAACAGCGTGGACCGCTTGCTGCAACTCTCTCAGGGCCAGGCGGTGAAGGGCAATCAGCTGTTGCCCGTCTCACTGGTGA  
AAAGAAAAACCCCTGGCGCCCAATACGCAAACCGCCTCTCCCGCGCGTTGGCCGATTCATTAATGCAGCTGGCACGACAG  
GTTCCCGACTGGAAGCGGGCAGTGAGCGCAACGCAATTAATGTGAGTTAGCTCACTCATTAGGCACCCAGGCTTTTCACT  
TTATGCTTCCGGCTCGTATGTTGTGTGGAATTGTGAGCGGATAACAAATTCACACAGGAAAAGCTATGACCATGATTAC  
TTCGAGCTCGGTACCCGGGGATCCATTCTCCTGTGACTCGGAAGTGCATTTATCATCTCCATAAAACAAACCCGCCGTAGCG  
AGTTCAGATAAAATAAATCCCGCGAGTGCGAGGATTGTTATGTAATATTGGGTTTTATCATCTATATGTTTTGTACAGAGAG  
GGCAAGTATCGTTTTCCACCGTACTCGTGATAATAATTTTGCACGGTATCAGTCATTTCTCGCACATTGCAGAATGGGGATTTG  
TCTCATTAGACTTATAAACCTTTCATGGAATATTTGTATGCGCAGCTATATCTATACCTTCATCTACATAAACACCTCGTG  
ATGCTGCTGATGGAGACAAGACACCGGATCTGCACAACATTGATAACGCCCAATCTTTTTGCTCAGACTCTAACTCATTGATAC  
TCATTTATAAACTCCTTGCAATGTATGTCGTTTCAGCTAAACGGTATCAGCAATGTTTATGTAAGAAGACGTAAGATAATAC  
TCAACCCGATGTTTGTAGTACGGTCACTCATCTGACACTACAGACTCTGGCATCGCTGTGAAGACGACGCAAAATTCAGCATTTT  
CACAGCGTTATCTTTTACAAAACCGATCTCACTCTCCTTTGATGCGAATGCCAGCGTCAGACATCATATGCAGATACTACC  
TGCATCTGAACCCATTGACCTCCAACCCGTAATAGCGATGCGTAATGATGTCGATAGTTACTAACGGGTCTTGTTTCGATTA  
ACTGCCGAGAACTCTTCCAGGTCACAGTGCAGTGTGATAACAGGAGTCTTCCAGGATGGCGAACAACAAGAACTGG  
TTTTCCGCTTTCACGACTTCGTTGCTTTCCAGTTTAGCAATACGCTTACTCCATCCGAGATAAACACCTTCGTAATACTCACG  
CTGCTCGTTGAGTTTTGATTTTGTGTTTCAAGCTCAACACGAGTTTCCCTACTGTTAGCGCAATATCCTCGTTCTCCTGGT  
CGCGGCGTTTTGATGTATTGCTGGTTCTTTCCCGTTTCCAGCAGTTCACGACAATCGATGGTGTACCAATTCATGGAAA  
AGGTCTGCGTCAAATCCCGATCGTATGCATTGCCGCTCTGCGCTTCACGCGAGTGCCTGAGAGTTAATTTTCGCTCATTTC  
GAACCTCTCTGTTTACTGATAAGTTCCAGATCCTCCTGGCAACTTGACAAGTCCGACAACCCCTGAACGACAGGCGTCTTCG  
TTCATCTATCGGATCGCCACACTCACAACAATGAGTGGCAGATATAGCCTGGTGGTTCAGGCGGCGCATTTTTATTGCTGTGT  
TGCCTGTAATTTCTTATTTCTGATGCTGAATCAATGATGCTGCCATCTTTTATTAATCCCTGAACTGTTGGTTAATACGC  
ATGAGGGTGAATGCGAATAATAAGCTTGGCACTGGCCGCTGTTTTTACAACGTCGTGACTGGGAAAACCCCTGGCGTTACCCAA  
CTTAATCGCCTTGACGACATCCCCCTTTGCGCAGCTGGCGTAATAGCGAAGAGGCCCCGACCGATCGCCCTTCCCAACAGTT  
GCGCAGCCTGAATGGCAATGGCGCTTTGCTGGTTTTCCGGCACCAGAAGCGGTGCCGAAAGCTGGCTGGAGTGCATCTTC  
CTGAGCCGATACTGTCGTCGTCCTTCAAACCTGGCAGATGCACGGTTACGATGCGCCATCTACACCAACGTTGACCTATCCC  
ATTACGGTCAATCCGCCGTTTTGTTCCACGGAGAATCCGACGGGTTGTTACTCGCTCACATTTAATGTTGATGAAAGCTGGCT  
ACAGGAAGGCCAGACGCAATTTTGTATGGCGTTCTTATGGTTAAAAAATGAGCTGATTTAACAAAAATTTAATGCGAA  
TTTTAACAAAAATTAACGTTTACAATTTAAATATTTGCTTATACAATCTTCTGTTTTTGGGGCTTTTCTGATTATCAACCG  
GGGTACATATGATTGACATGCTAGTTTTTACGATTACCGTTCATCGATTCTCTTGTGTTGCTCCAGACTCTCAGGCAATGACCTG  
ATAGCCTTTGTAGATCTCTCAAAAATAGCTACCCCTCCGGCATTAAATTTATCAGCTAGAACGGTTGAATATCATATTGATGG  
TGATTTGACTGTCTCCGGCTTTTCTCACCTTTTGAATCTTTACCTACACATTACTCAGGCAATTGCATTTAAAATATATGAGG  
GTTCTAAAAATTTTATCCTTGGCTGAAATAAAGGCTTCTCCCGCAAAAAGTATTACAGGGTCATAATGTTTTTGGTACAAAC  
GATTTAGCTTTATGCTCTGAGGCTTTATTGCTTAATTTGCTAATTTCTTGGCTTGGCTGTATGATTTATTGGATGTTAATGC  
TACTACTATTAGTAGAATTGATGCCACCTTTTCAGCTCGCGCCCCAAATGAAAATATAGCTAAACAGGTTATTGACCATTTGC  
GAAATGATCTAATGGTCAAACCTAAATCTACTCGTTTCGAGAATTTGGGAATCAACTGTTATATGGAATGAAACTTCCAGACAC  
CGTACTTTAGTTGCATATTTAAACATGTTGAGCTACAGCATTATATTCAGCAATTAAGCTCTAAGCCATCCGCAAAAATGAC  
CTCTTATCAAAAGGAGCAATTAAGGTAATCTCTAATCCTGACCTGTTGGAGTTTGTCTCCGGTCTGGTTTCGCTTTGAAGCTC  
GAATTAACCGGATATTTGAAGTCTTTCGGGCTTCTCTTAATCTTTTTGATGCAATCCGCTTTGCTTCTGACTATAATAGT

CAGGGTAAAGACCTGATTTTTGATTATAGGTCATTCCTGTTTTCTGAACTGTTTAAAGCATTGAGGGGGATTCAATGAATAT  
 TTATGACGATTCGCGAGTATTGGACGCTATCCAGTCTAAACATTTTACTATTACCCCTCTGGCAAACTTCTTTTGCAAAA  
 CCTCTCGTATTTGGTTTTTATCGTCTGGTAAACGAGGGTTATGATAGTGTCTTACTATGCCTCGTAATTCCTTT  
 TGGCGTTATGTATCGCATTAGTTGAATGTGGTATTCTAAATCTCAACTGATGAATCTTTCTACCTGTAATAATGTTGTTCC  
 GTTAGTTCGTTTTTATTAACGTAGATTTTTCTTCCCAACGCTCTGACTGGTATAATGAGCCAGTTCCTTAAAAATCGCATAAGGTA  
 ATTCACAATGATTAAGTTGAAATTAACCATCTCAAGCCCAATTTACTACTCGTTCCTGGTGTTCCTCGTCAGGGCAAGCCTT  
 ATTCAGTGAATGAGCAGCTTTGTTACGTTGATTTGGGTAATGAATATCCGGTTCCTGTCAAGATTACTCTTGATGAAGGTGAG  
 CCAGCTATGCGCCTGGTCTGTACACCGTTCATCTGCTCTTTTCAAAGTTGGTCAGTTCGGTTCCTTATGATTGACCGTCT  
 GCGCCTCGTTCGGCTAAGTAACATGGAGCAGGTCCGGATTTCGACACAATTTATCAGGCGATGATACAAATCTCCGTTGTA  
 CTTTGTTCGCGCTGGTATAATCGCTGGGGGTCAAAGATGAGTGTTTAGTGTATCTTTTGCCTCTTTCGTTTTAGGTTGG  
 TGCCCTCGTAGTGGCATTACGTATTTTACCCGTTTAAATGGAAACTTCCTCATGAAAAAGTCTTTAGTCTCAAAGCCTCTGTA  
 GCCGTTGCTACCCCTCGTTCGATGCTGTCTTTCGCTGCTGAGGGTGACGATCCCGCAAAAAGCGGCCCTTAACTCCCTGCAAGC  
 CTCAGCGACCGAATATATCGGTTATGCGTGGCGATGGTGTGTGTCATGTGCGCGCAACTATCGGTATCAAGCTGTTTAAAG  
 AATTCACCTCGAAAGCAAGCTGATAAACCGATACAATTAAGGCTCCTTTTGGAGCCTTTTTTTGGAGATTTTCAACGTGAA  
 AAAATTAATATTCGCAATTCCTTTAGTTGTTCCCTTTCTATTCTCACTCCGCTGAAACTGTTGAAAGTTGTTTAGCAAAAATCCC  
 ATACAGAAAATTCATTTACTAACGCTCTGAAAGACGACAAAATTTAGATCGTTACGCTAACTATGAGGGCTGTCTGTGGAAT  
 GCTACAGGCCTTTGTAGTTTGTACTGGTGACGAAACTCAGTGTACGGTACATGGGTTCCTATTGGGCTTGATTTCCCTGAAAA  
 TGAGGGTGGTGGCTCTGAGGGTGGCGGTTCTGAGGGTGGCGGTTCTGAGGGTGGCGGTTACTAAACCTCTGAGTACGGTATA  
 CACCTATTCCGGGCTATACTTATATCAACCCTCTCGACGGCACTTATCCGCTGGTACTGAGCAAAAACCCCGCTAATCCTAAT  
 CCTTCTTTGAGGAGTCTCAGCCTCTAATACTTTTATGTTTCAGAAATAATAGGTTCCGAAATAGGCAGGGGGCATTAACTGT  
 TTATACGGGCAGTGTACTCAAGGCACTGACCCCGTTAAACTTATTACCAGTACACTCTCTGTATCATCAAAGCCATGTATG  
 ACGCTTACTGGAACGGTAAATTCAGAGACTGCGCTTCCATTCTGGCTTTAATGAGGATTTATTTGTTTGTGAATATCAAGGC  
 CAATCGTCTGACCTGCCTCAACCTCTGTCAATGCTGGCGCGGCTCTGGTGGTGGTCTGGTGGCGGCTCTGAGGTTGGTGG  
 CTCTGAGGGTGGCGGTTCTGAGGGTGGCGGCTCTGAGGGAGCGGTTCCGGTGGTGGCTCTGGTTCCGGTATTGTTGATTATG  
 AAAAGATGGCAAACGCTAATAAGGGGGCTATGACCGAAAATGCCGATGAAAACGCGCTACAGTCTGACGCTAAAGGCAAACTT  
 GATTCGTGCGTACTGATTACGGTGTCTATCGATGGTTCATTGGTGACGTTTCCGGCCTTGCTAATGGTAATGGTGTCTAC  
 TGGTATTTTGGTGGCTTAATTCCAAATGGCTCAAGTCCGGTACGGTATAATTCACCTTTAATGAATAATTTCCGTCAAT  
 ATTTACCTTCCCTCCCTCAATCGGTTGAATGTGCGCCCTTTTGTCTTTGGCGCTGGTAAACCATATGAATTTTCTATTGATTGT  
 GACAAAATAAACTTATTCGGTGTGTCTTTGCGTTCTTTTATATGTTGCCACCTTTATGTATGTATTTTCTACGTTTGTCTAA  
 CATACTCGTAATAAGGAGTCTTAATCATGCCAGTTCCTTTGGGTAATTCGGTATTATTCGCTTTCCCTGGTTCCTTCTGTT  
 AACTTTGTTCCGCTATCTGCTTACTTTTCTTAAAAAGGGCTTCGGTAAGATAGCTATTGCTATTTTCAATTTCTTCTGCTCTTA  
 TTATTGGGCTTAACTCAATTCCTGTGGGTTATCTCTCTGATATTAGCGCTCAATTACCTCTGACTTTGTTTCAAGGTTGTTTCA  
 TTAATCTCCCGTCTAATGCGCTTCCCTGTTTTTATGTTATTTCTCTCTGTAAGGCTGCTATTTTCAATTTTGGCCTTAAACA  
 AAAATCGTTTTCTTATTTGGATTGGGATAAATAATATGGCTGTTTTATTTGTAAGTGGCAAATAGGCTCTGGAAAGACGCTC  
 GTTAGCGTTGGTAAGATTGAGGATAAAATGTAGCTGGGTGCAAAATAGCAACTAATCTTGATTTAAGGCTTCAAACCTCCC  
 GCAAGTCCGGAGGTTTCGATAAACGCTCCGCTCTTAGAATACCGGATAAGCCTTCTATATCTGATTTGCTTGTCTATTGGGC  
 CGGTAATGATTTCTAACCAACCTAACCCGAGGTTAAAAAGGTAAGTCTCTCAGACCTATGATTTGGTTAATAACCCGTTCTGG  
 AATGATAAGGAAAGACAGCCGATTTATGATTGGTTCCTACATGCTCGTAAATAGGATGGGATATTATTTTTCTTGTTCAGGA  
 CTTATCTATTGTTGATAAACAGGCGGCTTCTGCATTAGCTGAACATGTTGTTTATTGTCGTCGCTGGACAGAATTACTTTAC  
 CTTTTGTCGGTACTTTATATTCTCTTATTACTGGCTCGAAAATGCCTCTGCCTAAATTACATGTTGGCGTTGTTAAATATGGC  
 GATTCCTCAATTAAGCCCTACTGTTGAGCGTTGGCTTTATACTGGTAAGAATTTGTATAACGCATATGATACTAAACAGGCTTT  
 TTCTAGTAATATGATTCGGTGTATTCTTATTTAAACGCTTATTTATCACACGGTCCGGTATTTCAAACCATTAATTTAG  
 GTCAGAAGATGAAATTAACATAAATATATTTGAAAAAGTTTTCTCGCTTCTTTGCTTTCGATTTGGATTGGATTGATCAGCATTT  
 ACATATAGTTATATAACCAACCTAACCCGAGGTTAAAAAGGTAAGTCTCTCAGACCTATGATTTGGTTAATAACCATTTGA  
 CTCTTCTCAGCGTCTTAATCTAAGCTATCGCTATGTTTTCAAGGATTCTAAGGGAAAAATTAATTAATAGCGACGATTTACAGA  
 AGCAAGGTTATTCACCTACATATATGATTTATGTACTGTTTCCATTAATAAGGTAATCAAATGAAATGTTAAATGTAAT  
 TAATTTGTTTTCTGATGTTTGTTCATCATCTCTTTTGTCTCAGGTAATGAAATGAATAATTCGCCCTCTGCGCGATTTTG  
 TAACCTGGTATTCAAAGCAATCAGGCGAATCCGTTATGTTTCTCCCGATGTAAGGTAAGTACTGTTACTGTATATTCATCTGAC  
 GTTAAACCTGAAAATCTACGCAATTTCTTATTTCTGTTTTACGTGCAAAATAATTTGATATGGTAGGTTCTAACCCCTCCAT  
 TATTCAGAAGTATAATCCAAACAATCAGGATTATATTGATGAATGGCATCATCTGATAATCAGGAATATGATGATAAATCCCG  
 CTCCTTCTGGTGGTTCCTTTGTTCCGCAAAATGATAATGTTACTCAAACTTTTAAAAATTAATAACGTTCCGGCAAGGATTTA  
 ATACGAGTTGTGCAATGTTTGTAAAGTCTAATACTCTAAATCCTCAAATGTATTATCTATTGACGGCTCTAATCTATTAGT  
 TGTTAGTGTCTTAAAGATATTTTAGATAACCTTCTCAATTCCTTTCAACTGTTGATTTGCCAAGTACGAGATATTGATTG  
 AGGGTTTGTATTTGAGGTTACGCAAGGTGATGCTTTAGATTTTTTCAATTTGCTGCTGGCTCTCAGCGTGGCACTGTTGACGGC  
 GGTGTTAATACTGACCGCCTCACCTCTGTTTTATCTTCTGCTGGTGGTTCGTTCCGGTATTTTTAATGGCGATGTTTTAGGGCT  
 ATCAGTTCGCGCATTAAAGACTAATAGCCATTAATAAATGTTCTGTGTCAGGATTTCTTACGCTTACAGTTCAGGTCAGAAGGTT  
 CTATCTGTTGGCCAGAATGTCCTTTTATTACTGCGTGTGACTGGTGAATCTGCCAATGTAATTAATCCATTTCAGACG  
 ATTGAGCGTCAAATGTAGGTTATTTCCATGAGCGTTTTTCTGTTGCAATGGCTGGCGGTAATATTGTTCTGGATATTACCAG  
 CAAGGCCGATAGTTGAGTTCCTTACTCAGGCAAGTATGTTATTACTAATCAAAGAAGTATTGCTACAACGGTTAATTTGCG  
 GTGATGGACAGACTCTTTACTCGGTGGCCTCAGTGAATATAAAAACTTCTCAGGATTTGGCGTACCGTTCCTGTCTAAA  
 ATCCCTTTAATCGGCCCTCTGTTTAGCTCCCGCTCTGATTCTAACGAGGAAAGCACGTTATACGTGCTCGTCAAAGCAACCAT  
 AGTACGCGCCCTGTAGCGGCGCATTAAAGCGCGGGGGTGTGGTGGTTACGCGCAGCGTGACCGCTACACTTGCAGCGCCCTTA  
 GCGCCGCTCCTTTTCGCTTTCTTCCCTTCTTCTCGCCACGTTCCCGGCTTTCCCGCTCAAGCTCAAATCGGGGGCTCCCT  
 TTTAGGGTTCCGATTTAGTGTCTTACGGCACCTCGACCCCAAAAACCTTGATTTGGGTGATGTTTACGTTAGTGGCCATCCG  
 CC
